# Supplementary material
Source: PubMed Central journal article supplement (PMC3364926)
Supplement: supp_111.097089_biolreprod.111.097089-1.pdf [file supp_111.097089_biolreprod.111.097089-1.pdf]

## Filant et al., Supplemental Table S3. Genes decreased by progesterone treatment.

| Probe Name    | Gene Symbol          | Gene Name                                                        | Fold Change |
|---------------|----------------------|------------------------------------------------------------------|-------------|
| A_66_P115004  | <i>Gabrp</i>         | gamma-aminobutyric acid (GABA) A receptor. pi                    | -27.12      |
| A_51_P334942  | <i>Aldh1a1</i>       | aldehyde dehydrogenase family 1. subfamily A1                    | -10.15      |
| A_51_P287100  | <i>Cdh16</i>         | cadherin 16                                                      | -10.10      |
| A_55_P1971006 | <i>1190003J15Rik</i> | RIKEN cDNA 1190003J15 gene                                       | -8.97       |
| A_55_P1996314 | <i>Amy2a5</i>        | amylase 2a5                                                      | -7.79       |
| A_66_P109708  | <i>Il1f6</i>         | interleukin 1 family. member 6                                   | -7.37       |
| A_55_P2174582 | <i>1190003J15Rik</i> | RIKEN cDNA 1190003J15 gene                                       | -6.93       |
| A_55_P2025687 | <i>Muc4</i>          | mucin 4                                                          | -6.64       |
| A_51_P423743  | <i>Cldn6</i>         | claudin 6                                                        | -6.02       |
| A_52_P214630  | <i>Sox9</i>          | SRY-box containing gene 9                                        | -5.95       |
| A_52_P214630  | <i>Sox9</i>          | SRY-box containing gene 9                                        | -5.85       |
| A_55_P2043486 | <i>Msx2</i>          | homeobox. msh-like 2                                             | -5.82       |
| A_52_P214630  | <i>Sox9</i>          | SRY-box containing gene 9                                        | -5.72       |
| A_55_P2027235 | <i>BC048679</i>      | cDNA sequence BC048679                                           | -5.61       |
| A_52_P214630  | <i>Sox9</i>          | SRY-box containing gene 9                                        | -5.57       |
| A_52_P214630  | <i>Sox9</i>          | SRY-box containing gene 9                                        | -5.54       |
| A_52_P214630  | <i>Sox9</i>          | SRY-box containing gene 9                                        | -5.51       |
| A_51_P136521  | <i>Lypd2</i>         | Ly6/Plaur domain containing 2                                    | -5.48       |
| A_51_P422751  | <i>Clca3</i>         | chloride channel calcium activated 3                             | -5.41       |
| A_55_P2085335 | <i>Mia1</i>          | melanoma inhibitory activity 1                                   | -5.26       |
| A_52_P87843   | <i>Aldh1a3</i>       | aldehyde dehydrogenase family 1. subfamily A3                    | -5.16       |
| A_55_P2089219 | <i>LOC100046616</i>  | similar to aquaporin 5                                           | -5.14       |
| A_52_P214630  | <i>Sox9</i>          | SRY-box containing gene 9                                        | -5.12       |
| A_51_P419226  | <i>S100a14</i>       | S100 calcium binding protein A14                                 | -5.10       |
| A_55_P1977431 | <i>Cck</i>           | cholecystokinin                                                  | -5.04       |
| A_55_P1990121 | <i>Aqp5</i>          | aquaporin 5                                                      | -5.02       |
| A_51_P312336  | <i>Slc14a1</i>       | solute carrier family 14 (urea transporter). member 1            | -4.94       |
| A_52_P214630  | <i>Sox9</i>          | SRY-box containing gene 9                                        | -4.81       |
| A_55_P2026270 | <i>Cfi</i>           | complement component factor i                                    | -4.77       |
| A_55_P1959828 | <i>Tmem20</i>        | transmembrane protein 20                                         | -4.76       |
| A_51_P373393  | <i>Lce3c</i>         | late cornified envelope 3C                                       | -4.66       |
| A_51_P211506  | <i>Muc20</i>         | mucin 20                                                         | -4.60       |
| A_55_P1981994 | <i>Krt17</i>         | keratin 17                                                       | -4.60       |
| A_52_P90684   | <i>Klhl31</i>        | kelch-like 31 (Drosophila)                                       | -4.54       |
| A_51_P477121  | <i>Pmaip1</i>        | phorbol-12-myristate-13-acetate-induced protein 1                | -4.47       |
| A_55_P2156425 | <i>Upk1a</i>         | uroplakin 1A                                                     | -4.42       |
| A_51_P224164  | <i>Slc26a4</i>       | solute carrier family 26. member 4                               | -4.37       |
| A_52_P214630  | <i>Sox9</i>          | SRY-box containing gene 9                                        | -4.35       |
| A_51_P353252  | <i>Mal2</i>          | mal. T-cell differentiation protein 2                            | -4.23       |
| A_55_P2126192 | <i>Lgr5</i>          | leucine rich repeat containing G protein coupled receptor 5      | -4.19       |
| A_55_P1987650 | <i>Ctnnd2</i>        | catenin (cadherin associated protein). delta 2                   | -4.18       |
| A_55_P2119892 | <i>ErbB4</i>         | v-erb-a erythroblastic leukemia viral oncogene homolog 4 (avian) | -4.14       |
| A_52_P298394  | <i>Lqi1</i>          | leucine-rich repeat LGI family. member 1                         | -4.04       |
| A_55_P2019784 | <i>Lrrtm1</i>        | leucine rich repeat transmembrane neuronal 1                     | -4.03       |
| A_55_P2113160 | <i>Mal</i>           | myelin and lymphocyte protein. T-cell differentiation protein    | -3.89       |
| A_55_P2113439 | <i>Caln1</i>         | calneuron 1                                                      | -3.85       |
| A_52_P382886  | <i>Gjb2</i>          | gap junction protein. beta 2                                     | -3.80       |
| A_55_P2304507 | <i>Noxa1</i>         | NADPH oxidase activator 1                                        | -3.77       |
| A_55_P2006261 | <i>Krt15</i>         | keratin 15                                                       | -3.74       |
| A_51_P182131  | <i>5330417C22Rik</i> | RIKEN cDNA 5330417C22 gene                                       | -3.71       |
| A_55_P2070992 | <i>Aldoc</i>         | aldolase C. fructose-bisphosphate                                | -3.64       |
| A_55_P2026275 | <i>Ppp1r1b</i>       | protein phosphatase 1. regulatory (inhibitor) subunit 1B         | -3.52       |
| A_55_P2183884 | <i>Mc4r</i>          | melanocortin 4 receptor                                          | -3.45       |
| A_51_P375783  | <i>Prap1</i>         | proline-rich acidic protein 1                                    | -3.45       |
| A_51_P404193  | <i>Sp5</i>           | trans-acting transcription factor 5                              | -3.43       |
| A_52_P203560  | <i>Fzd10</i>         | frizzled homolog 10 (Drosophila)                                 | -3.39       |

|               |                      |                                                                                              |       |
|---------------|----------------------|----------------------------------------------------------------------------------------------|-------|
| A_55_P2052563 | <i>Id1</i>           | inhibitor of DNA binding 1                                                                   | -3.39 |
| A_55_P2095039 | <i>A330049M08Rik</i> | RIKEN cDNA A330049M08 gene                                                                   | -3.37 |
| A_52_P619192  | <i>Rundc3b</i>       | RUN domain containing 3B                                                                     | -3.35 |
| A_52_P204331  | <i>D630039A03Rik</i> | RIKEN cDNA D630039A03 gene                                                                   | -3.35 |
| A_51_P446131  | <i>Gipc2</i>         | GIPC PDZ domain containing family. member 2                                                  | -3.35 |
| A_51_P380432  | <i>Scx</i>           | scleraxis                                                                                    | -3.34 |
| A_55_P2009305 | <i>LOC100046189</i>  | hypothetical protein LOC100046189                                                            | -3.34 |
| A_51_P183051  | <i>Upb1</i>          | ureidopropionase. beta                                                                       | -3.30 |
| A_55_P1984881 | <i>1700024P16Rik</i> | RIKEN cDNA 1700024P16 gene                                                                   | -3.29 |
| A_51_P251352  | <i>Slc25a13</i>      | solute carrier family 25 (mitochondrial carrier. adenine nucleotide translocator). member 13 | -3.29 |
| A_55_P2116689 | <i>1700024P16Rik</i> | RIKEN cDNA 1700024P16 gene                                                                   | -3.28 |
| A_55_P2100928 | <i>Ptgds</i>         | prostaglandin D2 synthase (brain)                                                            | -3.27 |
| A_52_P655687  | <i>Egfl6</i>         | EGF-like-domain. multiple 6                                                                  | -3.25 |
| A_55_P1979714 | <i>Klk11</i>         | kallikrein related-peptidase 11                                                              | -3.23 |
| A_55_P2059432 | <i>Crabp2</i>        | cellular retinoic acid binding protein II                                                    | -3.23 |
| A_51_P505617  | <i>Il18r1</i>        | interleukin 18 receptor 1                                                                    | -3.16 |
| A_51_P153423  | <i>Fndc1</i>         | fibronectin type III domain containing 1                                                     | -3.12 |
| A_51_P139678  | <i>Sprr1a</i>        | small proline-rich protein 1A                                                                | -3.09 |
| A_55_P1978681 | <i>Tspan8</i>        | tetraspanin 8                                                                                | -3.07 |
| A_51_P279232  | <i>Dennd2d</i>       | DENN/MADD domain containing 2D                                                               | -3.07 |
| A_51_P220278  | <i>Ppp2r2b</i>       | protein phosphatase 2 (formerly 2A). regulatory subunit B (PR 52). beta isoform              | -3.05 |
| A_51_P243514  | <i>Macc1</i>         | metastasis associated in colon cancer 1                                                      | -3.04 |
| A_52_P482251  | <i>Gjb6</i>          | gap junction protein. beta 6                                                                 | -3.04 |
| A_55_P2054082 | <i>Chst9</i>         | carbohydrate (N-acetylgalactosamine 4-O) sulfotransferase 9                                  | -3.02 |
| A_55_P2015994 | <i>Fgf9</i>          | fibroblast growth factor 9                                                                   | -3.00 |
| A_51_P324351  | <i>Mfi2</i>          | antigen p97 (melanoma associated) identified by monoclonal antibodies 133.2 and 96.5         | -2.96 |
| A_51_P291078  | <i>Sel1l3</i>        | sel-1 suppressor of lin-12-like 3 (C. elegans)                                               | -2.95 |
| A_51_P411345  | <i>Mogat2</i>        | monoacylglycerol O-acyltransferase 2                                                         | -2.92 |
| A_51_P271984  | <i>Tmem45b</i>       | transmembrane protein 45b                                                                    | -2.91 |
| A_51_P483118  | <i>Hmga1</i>         | high mobility group AT-hook 1                                                                | -2.90 |
| A_55_P2062246 | <i>Tgtp2</i>         | T-cell specific GTPase 2                                                                     | -2.88 |
| A_51_P386870  | <i>Sprr2f</i>        | small proline-rich protein 2F                                                                | -2.88 |
| A_52_P536494  | <i>Mycn</i>          | v-myc myelocytomatosis viral related oncogene. neuroblastoma derived (avian)                 | -2.83 |
| A_55_P2074656 | <i>Padi2</i>         | peptidyl arginine deiminase. type II                                                         | -2.81 |
| A_55_P2085835 | <i>5330417C22Rik</i> | RIKEN cDNA 5330417C22 gene                                                                   | -2.79 |
| A_55_P2130925 | <i>Ppp2r2b</i>       | protein phosphatase 2 (formerly 2A). regulatory subunit B (PR 52). beta isoform              | -2.79 |
| A_55_P2134236 | <i>Foxa2</i>         | forkhead box A2                                                                              | -2.75 |
| A_55_P2002757 | <i>Blnk</i>          | B-cell linker                                                                                | -2.74 |
| A_51_P215438  | <i>Prodh</i>         | proline dehydrogenase                                                                        | -2.73 |
| A_51_P254855  | <i>Ptgs2</i>         | prostaglandin-endoperoxide synthase 2                                                        | -2.72 |
| A_55_P2124941 | <i>Dbc1</i>          | deleted in bladder cancer 1 (human)                                                          | -2.69 |
| A_51_P225427  | <i>Pkp2</i>          | plakophilin 2                                                                                | -2.67 |
| A_55_P2112882 | <i>Adh6a</i>         | alcohol dehydrogenase 6A (class V)                                                           | -2.66 |
| A_51_P254855  | <i>Ptgs2</i>         | prostaglandin-endoperoxide synthase 2                                                        | -2.64 |
| A_52_P629333  | <i>BC021891</i>      | cDNA sequence BC021891                                                                       | -2.63 |
| A_52_P185907  | <i>Crabp1</i>        | cellular retinoic acid binding protein I                                                     | -2.62 |
| A_55_P2459897 | <i>A2m</i>           | alpha-2-macroglobulin                                                                        | -2.62 |
| A_55_P2181888 | <i>Tmem54</i>        | transmembrane protein 54                                                                     | -2.62 |
| A_66_P101930  | <i>Lce3b</i>         | late cornified envelope 3B                                                                   | -2.61 |
| A_51_P352303  | <i>Homer2</i>        | homer homolog 2 (Drosophila)                                                                 | -2.56 |
| A_51_P421303  | <i>Caly</i>          | calcyon neuron-specific vesicular protein                                                    | -2.56 |
| A_55_P1975185 | <i>Sqle</i>          | squalene epoxidase                                                                           | -2.56 |
| A_55_P2067342 | <i>Gm9782</i>        | predicted pseudogene 9782                                                                    | -2.55 |
| A_55_P2114779 | <i>Greb1</i>         | gene regulated by estrogen in breast cancer protein                                          | -2.55 |
| A_55_P1989673 | <i>Slco2a1</i>       | solute carrier organic anion transporter family. member 2a1                                  | -2.54 |
| A_66_P109519  | <i>Ehf</i>           | ets homologous factor                                                                        | -2.52 |

|               |                      |                                                                                  |       |
|---------------|----------------------|----------------------------------------------------------------------------------|-------|
| A_52_P374897  | <i>Arg2</i>          | arginase type II                                                                 | -2.52 |
| A_51_P408649  | <i>Shisa2</i>        | shisa homolog 2 ( <i>Xenopus laevis</i> )                                        | -2.50 |
| A_52_P79782   | <i>Wnt7a</i>         | wingless-related MMTV integration site 7A                                        | -2.49 |
| A_55_P1981291 | <i>Spink8</i>        | serine peptidase inhibitor. Kazal type 8                                         | -2.48 |
| A_51_P131408  | <i>Tnfrsf12a</i>     | tumor necrosis factor receptor superfamily, member 12a                           | -2.47 |
| A_55_P2111380 | <i>Ctnnd2</i>        | catenin (cadherin associated protein), delta 2                                   | -2.47 |
| A_51_P404463  | <i>1500015010Rik</i> | RIKEN cDNA 1500015010 gene                                                       | -2.46 |
| A_55_P2014427 | <i>Il17re</i>        | interleukin 17 receptor E                                                        | -2.45 |
| A_55_P2054261 | <i>C2cd4b</i>        | C2 calcium-dependent domain containing 4B                                        | -2.45 |
| A_55_P1985623 | <i>Abcc3</i>         | ATP-binding cassette, sub-family C (CFTR/MRP), member 3                          | -2.44 |
| A_55_P1962693 | <i>Pla2g5</i>        | phospholipase A2, group V                                                        | -2.43 |
| A_55_P1979828 | <i>Spr2g</i>         | small proline-rich protein 2G                                                    | -2.43 |
| A_55_P2075080 | <i>Fat2</i>          | FAT tumor suppressor homolog 2 ( <i>Drosophila</i> )                             | -2.43 |
| A_55_P2325663 | <i>Lass3</i>         | LAG1 homolog, ceramide synthase 3                                                | -2.42 |
| A_55_P2037428 | <i>Mogat1</i>        | monoacylglycerol O-acyltransferase 1                                             | -2.41 |
| A_55_P2095663 | <i>Pgr</i>           | progesterone receptor                                                            | -2.40 |
| A_55_P2148171 | <i>A330049M08Rik</i> | RIKEN cDNA A330049M08 gene                                                       | -2.40 |
| A_51_P520650  | <i>Dlgap1</i>        | discs, large ( <i>Drosophila</i> ) homolog-associated protein 1                  | -2.40 |
| A_55_P1998943 | <i>Oas1a</i>         | 2'-5' oligoadenylate synthetase 1A                                               | -2.39 |
| A_66_P119034  | <i>Pla2g7</i>        | phospholipase A2, group VII (platelet-activating factor acetylhydrolase, plasma) | -2.39 |
| A_51_P323770  | <i>Wfdc15a</i>       | WAP four-disulfide core domain 15A                                               | -2.38 |
| A_55_P2010116 | <i>Rab27b</i>        | RAB27b, member RAS oncogene family                                               | -2.38 |
| A_55_P2013665 | <i>Mybpc2</i>        | myosin binding protein C, fast-type                                              | -2.37 |
| A_51_P279100  | <i>Ptgs1</i>         | prostaglandin-endoperoxide synthase 1                                            | -2.37 |
| A_51_P254855  | <i>Ptgs2</i>         | prostaglandin-endoperoxide synthase 2                                            | -2.35 |
| A_55_P2120189 | <i>Gas2l3</i>        | growth arrest-specific 2 like 3                                                  | -2.35 |
| A_52_P51429   | <i>Dennd1c</i>       | DENN/MADD domain containing 1C                                                   | -2.34 |
| A_55_P2175955 | <i>Ano9</i>          | anoctamin 9                                                                      | -2.34 |
| A_55_P2103972 |                      |                                                                                  | -2.34 |
| A_55_P2023391 | <i>Grhl3</i>         | grainyhead-like 3 ( <i>Drosophila</i> )                                          | -2.34 |
| A_55_P2095251 | <i>Ell3</i>          | elongation factor RNA polymerase II-like 3                                       | -2.32 |
| A_55_P2008987 | <i>Ch25h</i>         | cholesterol 25-hydroxylase                                                       | -2.31 |
| A_55_P2070809 | <i>Ehf</i>           | ets homologous factor                                                            | -2.30 |
| A_55_P2083489 | <i>Fam129a</i>       | family with sequence similarity 129, member A                                    | -2.30 |
| A_51_P101460  | <i>Dsp</i>           | desmoplakin                                                                      | -2.29 |
| A_51_P101460  | <i>Dsp</i>           | desmoplakin                                                                      | -2.27 |
| A_66_P114784  | <i>Pla2g7</i>        | phospholipase A2, group VII (platelet-activating factor acetylhydrolase, plasma) | -2.26 |
| A_52_P402786  | <i>Prom1</i>         | prominin 1                                                                       | -2.26 |
| A_51_P454873  | <i>Npy</i>           | neuropeptide Y                                                                   | -2.26 |
| A_52_P447284  | <i>Clic6</i>         | chloride intracellular channel 6                                                 | -2.25 |
| A_51_P486155  | <i>Ocln</i>          | occludin                                                                         | -2.24 |
| A_51_P101460  | <i>Dsp</i>           | desmoplakin                                                                      | -2.24 |
| A_55_P2071236 | <i>Aqp5</i>          | aquaporin 5                                                                      | -2.23 |
| A_52_P139413  | <i>Tmem221</i>       | transmembrane protein 221                                                        | -2.23 |
| A_51_P101460  | <i>Dsp</i>           | desmoplakin                                                                      | -2.22 |
| A_51_P101460  | <i>Dsp</i>           | desmoplakin                                                                      | -2.22 |
| A_51_P317031  | <i>Ccdc109b</i>      | coiled-coil domain containing 109B                                               | -2.21 |
| A_55_P2059931 | <i>Prom1</i>         | prominin 1                                                                       | -2.20 |
| A_51_P196925  | <i>Cx3cl1</i>        | chemokine (C-X3-C motif) ligand 1                                                | -2.20 |
| A_52_P409833  | <i>Plat</i>          | plasminogen activator, tissue                                                    | -2.19 |
| A_55_P2081656 | <i>Gm6970</i>        | predicted gene 6970                                                              | -2.19 |
| A_51_P101460  | <i>Dsp</i>           | desmoplakin                                                                      | -2.19 |
| A_51_P349495  | <i>Mboat1</i>        | membrane bound O-acyltransferase domain containing 1                             | -2.19 |
| A_51_P270949  | <i>Hist1h1b</i>      | histone cluster 1, H1b                                                           | -2.19 |
| A_51_P101460  | <i>Dsp</i>           | desmoplakin                                                                      | -2.18 |
| A_51_P101460  | <i>Dsp</i>           | desmoplakin                                                                      | -2.18 |
| A_55_P1989215 | <i>Entpd8</i>        | ectonucleoside triphosphate diphosphohydrolase 8                                 | -2.18 |
| A_55_P2079619 | <i>Rnf43</i>         | ring finger protein 43                                                           | -2.18 |

|               |                      |                                                                            |       |
|---------------|----------------------|----------------------------------------------------------------------------|-------|
| A_55_P1985925 |                      |                                                                            | -2.17 |
| A_51_P461319  | <i>Gatm</i>          | glycine amidinotransferase (L-arginine:glycine amidinotransferase)         | -2.17 |
| A_52_P286098  | <i>Epb4.114b</i>     | erythrocyte protein band 4.1-like 4b                                       | -2.16 |
| A_51_P260850  | <i>Cntnap2</i>       | contactin associated protein-like 2                                        | -2.16 |
| A_51_P365019  | <i>Gclc</i>          | glutamate-cysteine ligase, catalytic subunit                               | -2.15 |
| A_55_P2011425 | <i>Atp10b</i>        | ATPase, class V, type 10B                                                  | -2.15 |
| A_55_P1960735 | <i>Gdf15</i>         | growth differentiation factor 15                                           | -2.15 |
| A_55_P2005984 | <i>Wfdc15b</i>       | WAP four-disulfide core domain 15B                                         | -2.15 |
| A_51_P418820  | <i>Tcfap2c</i>       | transcription factor AP-2, gamma                                           | -2.14 |
| A_55_P2213418 | <i>4933417E11Rik</i> | RIKEN cDNA 4933417E11 gene                                                 | -2.14 |
| A_65_P11216   |                      |                                                                            | -2.14 |
| A_51_P413866  | <i>Cfb</i>           | complement factor B                                                        | -2.13 |
| A_51_P123604  | <i>Ppwd1</i>         | peptidylprolyl isomerase domain and WD repeat containing 1                 | -2.13 |
| A_55_P2014124 | <i>Gjb3</i>          | gap junction protein, beta 3                                               | -2.11 |
| A_65_P18948   | <i>Ppm1h</i>         | protein phosphatase 1H (PP2C domain containing)                            | -2.11 |
| A_51_P261051  | <i>Dlx5</i>          | distal-less homeobox 5                                                     | -2.11 |
| A_55_P1983488 | <i>Lsr</i>           | lipolysis stimulated lipoprotein receptor                                  | -2.11 |
| A_51_P415395  | <i>C2cd4b</i>        | C2 calcium-dependent domain containing 4B                                  | -2.09 |
| A_55_P2150831 | <i>Cdh4</i>          | cadherin 4                                                                 | -2.08 |
| A_52_P292792  | <i>Col8a1</i>        | collagen, type VIII, alpha 1                                               | -2.08 |
| A_52_P596592  | <i>Rassf9</i>        | Ras association (RalGDS/AF-6) domain family (N-terminal) member 9          | -2.07 |
| A_51_P254855  | <i>Ptgs2</i>         | prostaglandin-endoperoxide synthase 2                                      | -2.07 |
| A_55_P2091592 | <i>Bnpl</i>          | BCL2/adenovirus E1B 19kD interacting protein like                          | -2.06 |
| A_51_P351970  | <i>Hells</i>         | helicase, lymphoid specific                                                | -2.06 |
| A_51_P123604  | <i>Ppwd1</i>         | peptidylprolyl isomerase domain and WD repeat containing 1                 | -2.06 |
| A_51_P221132  | <i>L2hgdh</i>        | L-2-hydroxyglutarate dehydrogenase                                         | -2.06 |
| A_55_P2164744 | <i>Muc20</i>         | mucin 20                                                                   | -2.06 |
| A_52_P441954  | <i>Ovol1</i>         | OVO homolog-like 1 (Drosophila)                                            | -2.05 |
| A_55_P2082203 | <i>Baz1a</i>         | bromodomain adjacent to zinc finger domain 1A                              | -2.05 |
| A_52_P521564  | <i>Gm70</i>          | predicted gene 70                                                          | -2.05 |
| A_55_P1998942 | <i>Oas1a</i>         | 2'-5' oligoadenylate synthetase 1A                                         | -2.04 |
| A_52_P354682  | <i>Elovl7</i>        | ELOVL family member 7, elongation of long chain fatty acids (yeast)        | -2.04 |
| A_51_P239984  | <i>Exo1</i>          | exonuclease 1                                                              | -2.04 |
| A_51_P336599  | <i>Kcne3</i>         | potassium voltage-gated channel, Isk-related subfamily, gene 3             | -2.03 |
| A_55_P2048085 | <i>Klhl14</i>        | kelch-like 14 (Drosophila)                                                 | -2.03 |
| A_51_P123604  | <i>Ppwd1</i>         | peptidylprolyl isomerase domain and WD repeat containing 1                 | -2.03 |
| A_51_P213476  | <i>Pgr</i>           | progesterone receptor                                                      | -2.03 |
| A_55_P1965154 | <i>Spc25</i>         | SPC25, NDC80 kinetochore complex component, homolog (S. cerevisiae)        | -2.03 |
| A_55_P2007601 | <i>Sftpd</i>         | surfactant associated protein D                                            | -2.02 |
| A_55_P2017826 | <i>Myb</i>           | myeloblastosis oncogene                                                    | -2.02 |
| A_51_P482503  | <i>Tpd52l1</i>       | tumor protein D52-like 1                                                   | -2.02 |
| A_52_P214630  | <i>Sox9</i>          | SRY-box containing gene 9                                                  | -2.02 |
| A_55_P2062627 | <i>2210411K11Rik</i> | RIKEN cDNA 2210411K11 gene                                                 | -2.02 |
| A_55_P1956812 | <i>Fam83g</i>        | family with sequence similarity 83, member G                               | -2.02 |
| A_51_P101460  | <i>Dsp</i>           | desmoplakin                                                                | -2.02 |
| A_51_P154842  | <i>Oas1f</i>         | 2'-5' oligoadenylate synthetase 1F                                         | -2.02 |
| A_55_P2008443 | <i>Mybpc1</i>        | myosin binding protein C, slow-type                                        | -2.01 |
| A_51_P254855  | <i>Ptgs2</i>         | prostaglandin-endoperoxide synthase 2                                      | -2.00 |
| A_51_P478098  | <i>Epb4.115</i>      | erythrocyte protein band 4.1-like 5                                        | -2.00 |
| A_52_P579933  | <i>Slc16a6</i>       | solute carrier family 16 (monocarboxylic acid transporters), member 6      | -2.00 |
| A_55_P2025765 | <i>Adam8</i>         | a disintegrin and metallopeptidase domain 8                                | -2.00 |
| A_52_P610987  | <i>Slc28a3</i>       | solute carrier family 28 (sodium-coupled nucleoside transporter), member 3 | -1.99 |
| A_55_P2090070 | <i>Myh14</i>         | myosin, heavy polypeptide 14                                               | -1.99 |
| A_52_P629748  |                      |                                                                            | -1.99 |
| A_51_P285669  | <i>Pigz</i>          | phosphatidylinositol glycan anchor biosynthesis, class Z                   | -1.99 |
| A_55_P1971991 | <i>1810019J16Rik</i> | RIKEN cDNA 1810019J16 gene                                                 | -1.99 |

|               |                      |                                                                |       |
|---------------|----------------------|----------------------------------------------------------------|-------|
| A_51_P126337  | <i>Fgf12</i>         | fibroblast growth factor 12                                    | -1.98 |
| A_51_P451428  | <i>Marveld2</i>      | MARVEL (membrane-associating) domain containing 2              | -1.98 |
| A_55_P1959728 | <i>Dlgap1</i>        | discs. large (Drosophila) homolog-associated protein 1         | -1.97 |
| A_66_P131979  | <i>Cdc6</i>          | cell division cycle 6 homolog (S. cerevisiae)                  | -1.97 |
| A_51_P270733  | <i>Syngr1</i>        | synaptogyrin 1                                                 | -1.97 |
| A_51_P397296  | <i>Marveld3</i>      | MARVEL (membrane-associating) domain containing 3              | -1.97 |
| A_51_P136337  | <i>Galm</i>          | galactose mutarotase                                           | -1.95 |
| A_55_P1977224 | <i>Wnt16</i>         | wingless-related MMTV integration site 16                      | -1.95 |
| A_55_P2091359 | <i>Padi2</i>         | peptidyl arginine deiminase. type II                           | -1.95 |
| A_55_P2012439 | <i>Tnfrsf19</i>      | tumor necrosis factor receptor superfamily. member 19          | -1.95 |
| A_55_P2172852 | <i>Ptplad2</i>       | protein tyrosine phosphatase-like A domain containing 2        | -1.94 |
| A_51_P336827  | <i>Cyb5b</i>         | cytochrome b5 type B                                           | -1.93 |
| A_51_P304397  | <i>Cpm</i>           | carboxypeptidase M                                             | -1.93 |
| A_51_P417074  | <i>Arhgap8</i>       | Rho GTPase activating protein 8                                | -1.93 |
| A_55_P2071354 | <i>Fam179a</i>       | family with sequence similarity 179. member A                  | -1.93 |
| A_55_P2101776 | <i>Adora1</i>        | adenosine A1 receptor                                          | -1.92 |
| A_55_P2141088 |                      |                                                                | -1.92 |
| A_51_P193185  | <i>Mb</i>            | myoglobin                                                      | -1.91 |
| A_55_P2105413 | <i>Mug1</i>          | murinoglobulin 1                                               | -1.90 |
| A_51_P123604  | <i>Ppwd1</i>         | peptidylprolyl isomerase domain and WD repeat containing 1     | -1.90 |
| A_55_P2019684 | <i>Bspry</i>         | B-box and SPRY domain containing                               | -1.90 |
| A_55_P1964174 | <i>Nme1</i>          | non-metastatic cells 1. protein (NM23A) expressed in           | -1.89 |
| A_55_P2032966 | <i>Hmgcs1</i>        | 3-hydroxy-3-methylglutaryl-Coenzyme A synthase 1               | -1.89 |
| A_51_P246677  | <i>Rec8</i>          | REC8 homolog (yeast)                                           | -1.89 |
| A_55_P2141084 | <i>Odz4</i>          | odd Oz/ten-m homolog 4 (Drosophila)                            | -1.89 |
| A_51_P123604  | <i>Ppwd1</i>         | peptidylprolyl isomerase domain and WD repeat containing 1     | -1.89 |
| A_55_P2085181 | <i>Chaf1b</i>        | chromatin assembly factor 1. subunit B (p60)                   | -1.89 |
| A_51_P123604  | <i>Ppwd1</i>         | peptidylprolyl isomerase domain and WD repeat containing 1     | -1.89 |
| A_55_P1997509 | <i>Zbtb32</i>        | zinc finger and BTB domain containing 32                       | -1.88 |
| A_55_P1985351 | <i>Slc35f2</i>       | solute carrier family 35. member F2                            | -1.88 |
| A_55_P2042743 | <i>Glrp1</i>         | glutamine repeat protein 1                                     | -1.88 |
| A_51_P367310  | <i>Chaf1b</i>        | chromatin assembly factor 1. subunit B (p60)                   | -1.88 |
| A_51_P219266  | <i>Tmprss6</i>       | transmembrane serine protease 6                                | -1.88 |
| A_55_P2021565 | <i>Ntf3</i>          | neurotrophin 3                                                 | -1.87 |
| A_52_P56397   | <i>2610002D18Rik</i> | RIKEN cDNA 2610002D18 gene                                     | -1.87 |
| A_55_P2109479 | <i>BC066028</i>      | cDNA sequence BC066028                                         | -1.87 |
| A_55_P2048937 | <i>Kif5c</i>         | kinesin family member 5C                                       | -1.87 |
| A_51_P146149  | <i>Napsa</i>         | napsin A aspartic peptidase                                    | -1.87 |
| A_55_P2122130 |                      |                                                                | -1.87 |
| A_51_P280446  | <i>Sdf2l1</i>        | stromal cell-derived factor 2-like 1                           | -1.87 |
| A_51_P483617  | <i>0610040J01Rik</i> | RIKEN cDNA 0610040J01 gene                                     | -1.86 |
| A_55_P2031692 | <i>Gstm6</i>         | glutathione S-transferase. mu 6                                | -1.86 |
| A_51_P507290  | <i>Klf5</i>          | Kruppel-like factor 5                                          | -1.86 |
| A_51_P455647  | <i>Car2</i>          | carbonic anhydrase 2                                           | -1.86 |
| A_66_P115467  | <i>Sfta2</i>         | surfactant associated 2                                        | -1.86 |
| A_55_P2404434 | <i>Rps6ka3</i>       | ribosomal protein S6 kinase polypeptide 3                      | -1.85 |
| A_51_P277795  | <i>2810474019Rik</i> | RIKEN cDNA 2810474019 gene                                     | -1.85 |
| A_52_P52946   | <i>4922501L14Rik</i> | RIKEN cDNA 4922501L14 gene                                     | -1.85 |
| A_55_P2074591 | <i>Ppm1h</i>         | protein phosphatase 1H (PP2C domain containing)                | -1.85 |
| A_51_P101460  | <i>Dsp</i>           | desmoplakin                                                    | -1.85 |
| A_55_P2013823 | <i>Gal3st1</i>       | galactose-3-O-sulfotransferase 1                               | -1.84 |
| A_52_P452667  | <i>Prom2</i>         | prominin 2                                                     | -1.84 |
| A_66_P121495  | <i>Psat1</i>         | phosphoserine aminotransferase 1                               | -1.83 |
| A_51_P148105  | <i>Rad51</i>         | RAD51 homolog (S. cerevisiae)                                  | -1.83 |
| A_55_P2075919 | <i>Arhgap40</i>      | Rho GTPase activating protein 40                               | -1.83 |
| A_55_P2100120 | <i>Nme1</i>          | non-metastatic cells 1. protein (NM23A) expressed in           | -1.83 |
| A_52_P219473  | <i>Cdc6</i>          | cell division cycle 6 homolog (S. cerevisiae)                  | -1.82 |
| A_55_P2046411 | <i>LOC674674</i>     | similar to farnesyl diphosphate synthetase                     | -1.82 |
| A_51_P158210  | <i>Mcm2</i>          | minichromosome maintenance deficient 2 mitotin (S. cerevisiae) | -1.81 |

|               |                      |                                                                                             |       |
|---------------|----------------------|---------------------------------------------------------------------------------------------|-------|
| A_55_P1973583 | <i>Hpn</i>           | hepsin                                                                                      | -1.81 |
| A_55_P2093679 | <i>Zfp599</i>        | zinc finger protein 599                                                                     | -1.81 |
| A_52_P681557  |                      |                                                                                             | -1.81 |
| A_55_P2163363 |                      |                                                                                             | -1.81 |
| A_52_P432570  | <i>Chdh</i>          | choline dehydrogenase                                                                       | -1.80 |
| A_55_P1983268 |                      |                                                                                             | -1.80 |
| A_52_P586944  | <i>Bmpr1b</i>        | bone morphogenetic protein receptor, type 1B                                                | -1.80 |
| A_55_P2148370 | <i>Gm2862</i>        | predicted gene 2862                                                                         | -1.80 |
| A_55_P1967820 | <i>Al661453</i>      | expressed sequence Al661453                                                                 | -1.79 |
| A_55_P2080931 | <i>4732456N10Rik</i> | RIKEN cDNA 4732456N10 gene                                                                  | -1.79 |
| A_55_P1963712 | <i>Cyb5b</i>         | cytochrome b5 type B                                                                        | -1.78 |
| A_55_P2092661 | <i>Nup210</i>        | nucleoporin 210                                                                             | -1.78 |
| A_66_P113892  | <i>1110017F19Rik</i> | RIKEN cDNA 1110017F19 gene                                                                  | -1.78 |
| A_55_P2011290 | <i>Odz2</i>          | odd Oz/ten-m homolog 2 (Drosophila)                                                         | -1.78 |
| A_55_P2182586 | <i>Esrp1</i>         | epithelial splicing regulatory protein 1                                                    | -1.78 |
| A_55_P2064676 | <i>LOC100047967</i>  | similar to growth arrest-specific 2 like 3                                                  | -1.77 |
| A_55_P2164534 | <i>Dtl</i>           | denticleless homolog (Drosophila)                                                           | -1.77 |
| A_55_P2146034 | <i>Abca4</i>         | ATP-binding cassette, sub-family A (ABC1), member 4                                         | -1.77 |
| A_55_P2168267 | <i>Gm8163</i>        | predicted gene 8163                                                                         | -1.77 |
| A_51_P268697  | <i>Slc1a3</i>        | solute carrier family 1 (glial high affinity glutamate transporter), member 3               | -1.77 |
| A_52_P175242  | <i>Irs1</i>          | insulin receptor substrate 1                                                                | -1.76 |
| A_51_P400366  | <i>Rhbg</i>          | Rhesus blood group-associated B glycoprotein                                                | -1.76 |
| A_51_P123134  | <i>Ercc6l</i>        | excision repair cross-complementing rodent repair deficiency complementation group 6 - like | -1.76 |
| A_55_P2136289 |                      |                                                                                             | -1.75 |
| A_52_P361081  | <i>Arhgef16</i>      | Rho guanine nucleotide exchange factor (GEF) 16                                             | -1.75 |
| A_51_P410949  | <i>Polr3g</i>        | polymerase (RNA) III (DNA directed) polypeptide G                                           | -1.75 |
| A_51_P123134  | <i>Ercc6l</i>        | excision repair cross-complementing rodent repair deficiency complementation group 6 - like | -1.75 |
| A_51_P454196  | <i>Sh2d4a</i>        | SH2 domain containing 4A                                                                    | -1.75 |
| A_66_P114295  | <i>7530422B04Rik</i> | RIKEN cDNA 7530422B04 gene                                                                  | -1.75 |
| A_66_P132222  | <i>Mlph</i>          | melanophilin                                                                                | -1.75 |
| A_55_P2058761 | <i>G6pc2</i>         | glucose-6-phosphatase, catalytic, 2                                                         | -1.75 |
| A_55_P2098911 | <i>Lrrcc1</i>        | leucine rich repeat and coiled-coil domain containing 1                                     | -1.74 |
| A_55_P2121886 | <i>Map3k9</i>        | mitogen-activated protein kinase kinase kinase 9                                            | -1.74 |
| A_55_P1979998 | <i>1700026L06Rik</i> | RIKEN cDNA 1700026L06 gene                                                                  | -1.73 |
| A_55_P2024406 | <i>Napepld</i>       | N-acyl phosphatidylethanolamine phospholipase D                                             | -1.73 |
| A_55_P2035400 | <i>Ripk4</i>         | receptor-interacting serine-threonine kinase 4                                              | -1.73 |
| A_51_P187901  | <i>Nop56</i>         | NOP56 ribonucleoprotein homolog (yeast)                                                     | -1.73 |
| A_52_P157880  | <i>Gm1947</i>        | predicted pseudogene 1947                                                                   | -1.73 |
| A_55_P1993807 | <i>Nudt10</i>        | nudix (nucleoside diphosphate linked moiety X)-type motif 10                                | -1.72 |
| A_52_P99888   | <i>Cxcl16</i>        | chemokine (C-X-C motif) ligand 16                                                           | -1.72 |
| A_51_P464146  | <i>Ankrd56</i>       | ankyrin repeat domain 56                                                                    | -1.72 |
| A_55_P1969396 | <i>Gm5809</i>        | predicted pseudogene 5809                                                                   | -1.72 |
| A_55_P1999992 | <i>Galnt12</i>       | UDP-N-acetyl-alpha-D-galactosamine:polypeptide N-acetylgalactosaminyltransferase 12         | -1.72 |
| A_55_P2140201 | <i>Dupd1</i>         | dual specificity phosphatase and pro isomerase domain containing 1                          | -1.72 |
| A_55_P2029417 | <i>2610318N02Rik</i> | RIKEN cDNA 2610318N02 gene                                                                  | -1.72 |
| A_55_P2078780 | <i>Etv4</i>          | ets variant gene 4 (E1A enhancer binding protein, E1AF)                                     | -1.72 |
| A_51_P368591  | <i>Tle6</i>          | transducin-like enhancer of split 6, homolog of Drosophila E(spl)                           | -1.72 |
| A_51_P137778  | <i>5730507C01Rik</i> | RIKEN cDNA 5730507C01 gene                                                                  | -1.71 |
| A_52_P97221   | <i>Bicd1</i>         | bicaudal D homolog 1 (Drosophila)                                                           | -1.71 |
| A_52_P174915  | <i>Gja1</i>          | gap junction protein, alpha 1                                                               | -1.71 |
| A_51_P492830  | <i>Cenph</i>         | centromere protein H                                                                        | -1.71 |
| A_51_P328489  | <i>1700025G04Rik</i> | RIKEN cDNA 1700025G04 gene                                                                  | -1.71 |
| A_51_P470989  | <i>Paip1</i>         | polyadenylate binding protein-interacting protein 1                                         | -1.71 |
| A_51_P123604  | <i>Ppwd1</i>         | peptidylprolyl isomerase domain and WD repeat containing 1                                  | -1.71 |
| A_55_P2054643 | <i>Nrxn3</i>         | neurexin III                                                                                | -1.71 |
| A_55_P2019751 | <i>Gm10307</i>       | predicted gene 10307                                                                        | -1.71 |

|               |                      |                                                                                                                    |       |
|---------------|----------------------|--------------------------------------------------------------------------------------------------------------------|-------|
| A_51_P519756  | <i>Rusc1</i>         | RUN and SH3 domain containing 1                                                                                    | -1.71 |
| A_51_P139320  | <i>Pcbd1</i>         | pterin 4 alpha carbinolamine dehydratase/dimerization cofactor of hepatocyte nuclear factor 1 alpha (TCF1) 1       | -1.71 |
| A_55_P2176953 | <i>Usp51</i>         | ubiquitin specific protease 51                                                                                     | -1.71 |
| A_55_P2069974 | <i>Kctd1</i>         | potassium channel tetramerisation domain containing 1                                                              | -1.71 |
| A_51_P324934  | <i>LOC100045677</i>  | similar to DNA replication licensing factor MCM3 (DNA polymerase alpha holoenzyme-associated protein P1) (P1-MCM3) | -1.70 |
| A_52_P406828  | <i>Dkc1</i>          | dyskeratosis congenita 1. dyskerin homolog (human)                                                                 | -1.70 |
| A_51_P227165  | <i>2310030G06Rik</i> | RIKEN cDNA 2310030G06 gene                                                                                         | -1.70 |
| A_55_P2147896 | <i>C2cd4a</i>        | C2 calcium-dependent domain containing 4A                                                                          | -1.70 |
| A_55_P2052330 | <i>Gm5864</i>        | predicted gene 5864                                                                                                | -1.70 |
| A_55_P1973563 | <i>5730559C18Rik</i> | RIKEN cDNA 5730559C18 gene                                                                                         | -1.69 |
| A_55_P2079928 | <i>Ccdc68</i>        | coiled-coil domain containing 68                                                                                   | -1.69 |
| A_52_P174915  | <i>Gja1</i>          | gap junction protein. alpha 1                                                                                      | -1.69 |
| A_66_P139196  | <i>Baz1a</i>         | bromodomain adjacent to zinc finger domain 1A                                                                      | -1.69 |
| A_55_P1955072 | <i>Alad</i>          | aminolevulinatase. delta-. dehydratase                                                                             | -1.69 |
| A_55_P1966804 | <i>Fdps</i>          | farnesyl diphosphate synthetase                                                                                    | -1.69 |
| A_51_P240986  | <i>Plekhg6</i>       | pleckstrin homology domain containing, family G (with RhoGef domain) member 6                                      | -1.69 |
| A_55_P2100212 | <i>Cfc1</i>          | cripto. FRL-1. cryptic family 1                                                                                    | -1.68 |
| A_51_P239203  | <i>Mapk13</i>        | mitogen-activated protein kinase 13                                                                                | -1.68 |
| A_55_P2067722 | <i>2310057J16Rik</i> | RIKEN cDNA 2310057J16 gene                                                                                         | -1.68 |
| A_52_P302544  | <i>Col8a2</i>        | collagen. type VIII. alpha 2                                                                                       | -1.68 |
| A_55_P1989663 | <i>Slico3a1</i>      | solute carrier organic anion transporter family. member 3a1                                                        | -1.68 |
| A_55_P2177103 | <i>Slc25a5</i>       | solute carrier family 25 (mitochondrial carrier. adenine nucleotide translocator). member 5                        | -1.68 |
| A_66_P116678  | <i>Rps8</i>          | ribosomal protein S8                                                                                               | -1.68 |
| A_55_P2091230 | <i>Gm5391</i>        | predicted gene 5391                                                                                                | -1.68 |
| A_55_P1969181 | <i>Paox</i>          | polyamine oxidase (exo-N4-amino)                                                                                   | -1.68 |
| A_51_P254855  | <i>Ptgs2</i>         | prostaglandin-endoperoxide synthase 2                                                                              | -1.68 |
| A_51_P265495  | <i>Ly6a</i>          | lymphocyte antigen 6 complex. locus A                                                                              | -1.68 |
| A_52_P552194  | <i>Il13ra1</i>       | interleukin 13 receptor. alpha 1                                                                                   | -1.68 |
| A_51_P439403  | <i>Padi1</i>         | peptidyl arginine deiminase. type 1                                                                                | -1.68 |
| A_55_P1953087 | <i>Mcm3</i>          | minichromosome maintenance deficient 3 (S. cerevisiae)                                                             | -1.68 |
| A_55_P2177614 | <i>Srsf3</i>         | serine/arginine-rich splicing factor 3                                                                             | -1.68 |
| A_55_P2095084 | <i>Abca4</i>         | ATP-binding cassette. sub-family A (ABC1). member 4                                                                | -1.67 |
| A_52_P583458  | <i>E2f3</i>          | E2F transcription factor 3                                                                                         | -1.67 |
| A_51_P279038  | <i>Ppargc1a</i>      | peroxisome proliferative activated receptor. gamma. coactivator 1 alpha                                            | -1.67 |
| A_51_P254855  | <i>Ptgs2</i>         | prostaglandin-endoperoxide synthase 2                                                                              | -1.67 |
| A_51_P356762  | <i>Mcm4</i>          | minichromosome maintenance deficient 4 homolog (S. cerevisiae)                                                     | -1.67 |
| A_55_P2035286 | <i>Uhrf1</i>         | ubiquitin-like. containing PHD and RING finger domains. 1                                                          | -1.66 |
| A_55_P1959218 | <i>Usp51</i>         | ubiquitin specific protease 51                                                                                     | -1.66 |
| A_51_P379478  | <i>Nckap5</i>        | NCK-associated protein 5                                                                                           | -1.66 |
| A_55_P2023235 | <i>Fen1</i>          | flap structure specific endonuclease 1                                                                             | -1.66 |
| A_55_P2029420 | <i>2610318N02Rik</i> | RIKEN cDNA 2610318N02 gene                                                                                         | -1.65 |
| A_55_P2009375 | <i>Cdk18</i>         | cyclin-dependent kinase 18                                                                                         | -1.65 |
| A_51_P123134  | <i>Ercc6l</i>        | excision repair cross-complementing rodent repair deficiency complementation group 6 - like                        | -1.65 |
| A_55_P1980125 | <i>Srsf3</i>         | serine/arginine-rich splicing factor 3                                                                             | -1.65 |
| A_55_P2120662 |                      |                                                                                                                    | -1.65 |
| A_51_P360492  | <i>Mcm6</i>          | minichromosome maintenance deficient 6 (MIS5 homolog. S. pombe) (S. cerevisiae)                                    | -1.64 |
| A_55_P2167040 | <i>Pvr14</i>         | poliovirus receptor-related 4                                                                                      | -1.64 |
| A_55_P1967539 | <i>Hunk</i>          | hormonally upregulated Neu-associated kinase                                                                       | -1.64 |
| A_51_P491227  | <i>Suclg1</i>        | succinate-CoA ligase. GDP-forming. alpha subunit                                                                   | -1.64 |
| A_55_P2056241 | <i>Pdlim5</i>        | PDZ and LIM domain 5                                                                                               | -1.64 |
| A_55_P2177105 | <i>Gm5256</i>        | predicted gene 5256                                                                                                | -1.64 |
| A_52_P519783  | <i>Ltk</i>           | leukocyte tyrosine kinase                                                                                          | -1.64 |
| A_55_P1990032 | <i>Cxcl5</i>         | chemokine (C-X-C motif) ligand 5                                                                                   | -1.64 |
| A_55_P1967538 | <i>Hunk</i>          | hormonally upregulated Neu-associated kinase                                                                       | -1.64 |
| A_52_P89335   | <i>Tmie</i>          | transmembrane inner ear                                                                                            | -1.64 |

|               |                      |                                                                                        |       |
|---------------|----------------------|----------------------------------------------------------------------------------------|-------|
| A_55_P1972025 | <i>Mycl1</i>         | v-myc myelocytomatosis viral oncogene homolog 1, lung carcinoma derived (avian)        | -1.64 |
| A_55_P1973868 | <i>Sema3b</i>        | sema domain, immunoglobulin domain (Ig), short basic domain, secreted, (semaphorin) 3B | -1.64 |
| A_51_P123604  | <i>Ppwd1</i>         | peptidylprolyl isomerase domain and WD repeat containing 1                             | -1.63 |
| A_51_P364485  | <i>Tnfaip2</i>       | tumor necrosis factor, alpha-induced protein 2                                         | -1.63 |
| A_55_P2124976 | <i>Grhl1</i>         | grainyhead-like 1 (Drosophila)                                                         | -1.63 |
| A_55_P2147971 | <i>Ranbp1</i>        | RAN binding protein 1                                                                  | -1.63 |
| A_55_P2036907 | <i>Mycbpap</i>       | MYCBP associated protein                                                               | -1.63 |
| A_55_P2303110 | <i>Ccnb3</i>         | cyclin B3                                                                              | -1.63 |
| A_55_P2026761 | <i>LOC634846</i>     | similar to farnesyl diphosphate synthetase                                             | -1.63 |
| A_55_P2159264 | <i>Lifr</i>          | leukemia inhibitory factor receptor                                                    | -1.63 |
| A_55_P2185273 | <i>Umps</i>          | uridine monophosphate synthetase                                                       | -1.63 |
| A_55_P2096762 | <i>Arhgdig</i>       | Rho GDP dissociation inhibitor (GDI) gamma                                             | -1.63 |
| A_51_P472393  |                      |                                                                                        | -1.63 |
| A_55_P2006604 | <i>2810474019Rik</i> | RIKEN cDNA 2810474019 gene                                                             | -1.63 |
| A_55_P2132651 | <i>Wisp1</i>         | WNT1 inducible signaling pathway protein 1                                             | -1.63 |
| A_55_P2032258 | <i>Pdlim1</i>        | PDZ and LIM domain 1 (elfin)                                                           | -1.62 |
| A_52_P401311  | <i>Gm5529</i>        | predicted pseudogene 5529                                                              | -1.62 |
| A_55_P2159949 | <i>Polr1e</i>        | polymerase (RNA) I polypeptide E                                                       | -1.62 |
| A_52_P8043    | <i>Srsf2</i>         | serine/arginine-rich splicing factor 2                                                 | -1.62 |
| A_55_P2084631 | <i>Hist1h2an</i>     | histone cluster 1, H2an                                                                | -1.62 |
| A_55_P2176240 | <i>Pdxk</i>          | pyridoxal (pyridoxine, vitamin B6) kinase                                              | -1.62 |
| A_51_P408946  | <i>Ccne1</i>         | cyclin E1                                                                              | -1.62 |
| A_52_P87964   | <i>Pla2g12a</i>      | phospholipase A2, group XIA                                                            | -1.62 |
| A_55_P2076916 | <i>A230065H16Rik</i> | RIKEN cDNA A230065H16 gene                                                             | -1.62 |
| A_52_P72587   | <i>Prkcg</i>         | protein kinase C, theta                                                                | -1.62 |
| A_51_P368009  | <i>E2f2</i>          | E2F transcription factor 2                                                             | -1.62 |
| A_66_P138308  | <i>Cndp2</i>         | CNDP dipeptidase 2 (metallopeptidase M20 family)                                       | -1.62 |
| A_51_P517672  | <i>Rnf152</i>        | ring finger protein 152                                                                | -1.61 |
| A_51_P466673  | <i>Srsf7</i>         | serine/arginine-rich splicing factor 7                                                 | -1.61 |
| A_51_P140321  | <i>Mocos</i>         | molybdenum cofactor sulfurase                                                          | -1.61 |
| A_55_P1999823 | <i>Zmynd19</i>       | zinc finger, MYND domain containing 19                                                 | -1.61 |
| A_55_P1994128 | <i>Tmem184a</i>      | transmembrane protein 184a                                                             | -1.61 |
| A_55_P2013586 | <i>Prss8</i>         | protease, serine, 8 (prostatic)                                                        | -1.61 |
| A_51_P401501  | <i>Tmem213</i>       | transmembrane protein 213                                                              | -1.61 |
| A_51_P279437  | <i>Mfsd2a</i>        | major facilitator superfamily domain containing 2A                                     | -1.61 |
| A_52_P440621  | <i>Rassf10</i>       | Ras association (RalGDS/AF-6) domain family (N-terminal) member 10                     | -1.61 |
| A_55_P2058962 | <i>Mcm10</i>         | minichromosome maintenance deficient 10 (S. cerevisiae)                                | -1.61 |
| A_55_P2134022 | <i>Cfr</i>           | cystic fibrosis transmembrane conductance regulator homolog                            | -1.61 |
| A_52_P402897  | <i>Cdh4</i>          | cadherin 4                                                                             | -1.61 |
| A_51_P482711  | <i>Dhcr24</i>        | 24-dehydrocholesterol reductase                                                        | -1.61 |
| A_51_P337230  | <i>Galnt14</i>       | UDP-N-acetyl-alpha-D-galactosamine:polypeptide N-acetylgalactosaminyltransferase 14    | -1.61 |
| A_55_P2035102 | <i>LOC677259</i>     | similar to Ornithine decarboxylase (ODC)                                               | -1.60 |
| A_55_P2180551 | <i>Fam60a</i>        | family with sequence similarity 60, member A                                           | -1.60 |
| A_55_P1995173 | <i>Odc1</i>          | ornithine decarboxylase, structural 1                                                  | -1.60 |
| A_55_P2023294 | <i>Il20rb</i>        | interleukin 20 receptor beta                                                           | -1.60 |
| A_52_P258557  | <i>Slc26a9</i>       | solute carrier family 26, member 9                                                     | -1.60 |
| A_52_P186033  | <i>Spn</i>           | sialophorin                                                                            | -1.60 |
| A_55_P1998107 |                      |                                                                                        | -1.60 |
| A_55_P2114776 | <i>Greb1</i>         | gene regulated by estrogen in breast cancer protein                                    | -1.59 |
| A_51_P220343  | <i>Wisp1</i>         | WNT1 inducible signaling pathway protein 1                                             | -1.59 |
| A_55_P1969311 | <i>Gramd1b</i>       | GRAM domain containing 1B                                                              | -1.59 |
| A_55_P2084666 | <i>Hist1h2af</i>     | histone cluster 1, H2af                                                                | -1.59 |
| A_55_P2099961 | <i>Hist1h2ag</i>     | histone cluster 1, H2ag                                                                | -1.59 |
| A_55_P2012498 | <i>Cdca7</i>         | cell division cycle associated 7                                                       | -1.59 |
| A_51_P282837  | <i>St14</i>          | suppression of tumorigenicity 14 (colon carcinoma)                                     | -1.59 |
| A_52_P301085  | <i>Dctd</i>          | dCMP deaminase                                                                         | -1.59 |



|               |                      |                                                                  |       |
|---------------|----------------------|------------------------------------------------------------------|-------|
| A_55_P1959152 | <i>Gm10324</i>       | predicted gene 10324                                             | -1.59 |
| A_51_P502082  | <i>Rrm1</i>          | ribonucleotide reductase M1                                      | -1.59 |
| A_66_P100853  |                      |                                                                  | -1.59 |
| A_55_P2090777 | <i>BC048546</i>      | cDNA sequence BC048546                                           | -1.58 |
| A_55_P1974421 | <i>Itga3</i>         | integrin alpha 3                                                 | -1.58 |
| A_51_P126337  | <i>Fgf12</i>         | fibroblast growth factor 12                                      | -1.58 |
| A_51_P207892  | <i>Pla2g5</i>        | phospholipase A2. group V                                        | -1.58 |
| A_55_P2129437 | <i>Ppap2c</i>        | phosphatidic acid phosphatase type 2C                            | -1.58 |
| A_55_P2160682 | <i>Set</i>           | SET translocation                                                | -1.58 |
| A_51_P100208  | <i>Opcml</i>         | opioid binding protein/cell adhesion molecule-like               | -1.58 |
| A_55_P2048101 | <i>Gm6762</i>        | predicted pseudogene 6762                                        | -1.58 |
| A_55_P2047461 | <i>Fcho1</i>         | FCH domain only 1                                                | -1.58 |
| A_55_P2130448 | <i>Gm7278</i>        | predicted gene 7278                                              | -1.58 |
| A_51_P123604  | <i>Ppwd1</i>         | peptidylprolyl isomerase domain and WD repeat containing 1       | -1.58 |
| A_52_P296632  | <i>Gm6742</i>        | predicted gene 6742                                              | -1.57 |
| A_55_P2001188 | <i>Phf6</i>          | PHD finger protein 6                                             | -1.57 |
| A_51_P247614  | <i>Ncrna00086</i>    | non-protein coding RNA 86                                        | -1.57 |
| A_55_P2084652 | <i>Hist1h2ak</i>     | histone cluster 1. H2ak                                          | -1.57 |
| A_55_P1998797 | <i>Gm15470</i>       | predicted gene 15470                                             | -1.57 |
| A_52_P228236  | <i>Tfrc</i>          | transferrin receptor                                             | -1.57 |
| A_51_P198434  | <i>H2-K1</i>         | histocompatibility 2. K1. K region                               | -1.57 |
| A_51_P180032  | <i>Shfm1</i>         | split hand/foot malformation (ectrodactyly) type 1               | -1.57 |
| A_55_P1974567 | <i>Plch2</i>         | phospholipase C. eta 2                                           | -1.57 |
| A_51_P418016  | <i>Ccnj</i>          | cyclin J                                                         | -1.57 |
| A_55_P1997106 | <i>Gylt1b</i>        | glycosyltransferase-like 1B                                      | -1.57 |
| A_55_P1961084 | <i>Map3k1</i>        | mitogen-activated protein kinase kinase kinase 1                 | -1.57 |
| A_55_P2321919 | <i>A830060N17</i>    | hypothetical protein A830060N17                                  | -1.57 |
| A_52_P497625  | <i>A630001G21Rik</i> | RIKEN cDNA A630001G21 gene                                       | -1.57 |
| A_55_P2079757 | <i>Gm5699</i>        | predicted gene 5699                                              | -1.56 |
| A_51_P415905  | <i>Pola1</i>         | polymerase (DNA directed). alpha 1                               | -1.56 |
| A_55_P1954718 | <i>Cyb561</i>        | cytochrome b-561                                                 | -1.56 |
| A_51_P121252  | <i>Ints4</i>         | integrator complex subunit 4                                     | -1.56 |
| A_55_P2069226 | <i>Prr16</i>         | proline rich 16                                                  | -1.56 |
| A_52_P592909  | <i>Dgat2</i>         | diacylglycerol O-acyltransferase 2                               | -1.56 |
| A_55_P2046037 | <i>Gm7083</i>        | predicted gene 7083                                              | -1.56 |
| A_51_P154684  | <i>Thoc4</i>         | THO complex 4                                                    | -1.56 |
| A_55_P2103055 | <i>Gsr</i>           | glutathione reductase                                            | -1.56 |
| A_55_P1992079 | <i>Ptpnf</i>         | protein tyrosine phosphatase. receptor type. F                   | -1.56 |
| A_55_P1957880 | <i>Hn1l</i>          | hematological and neurological expressed 1-like                  | -1.56 |
| A_52_P817257  | <i>Gm5480</i>        | predicted gene 5480                                              | -1.56 |
| A_51_P470715  | <i>Cish</i>          | cytokine inducible SH2-containing protein                        | -1.55 |
| A_55_P2106255 | <i>Mbnl3</i>         | muscleblind-like 3 (Drosophila)                                  | -1.55 |
| A_55_P2415930 | <i>2900064F13Rik</i> | RIKEN cDNA 2900064F13 gene                                       | -1.55 |
| A_52_P174915  | <i>Gja1</i>          | gap junction protein. alpha 1                                    | -1.55 |
| A_52_P561671  | <i>Msx1</i>          | homeobox. msh-like 1                                             | -1.55 |
| A_55_P2041581 | <i>Gm6425</i>        | predicted pseudogene 6425                                        | -1.55 |
| A_55_P2039532 | <i>Pax8</i>          | paired box gene 8                                                | -1.55 |
| A_55_P2046408 | <i>Gm7979</i>        | predicted gene 7979                                              | -1.55 |
| A_55_P1982818 | <i>Odc1</i>          | ornithine decarboxylase. structural 1                            | -1.55 |
| A_52_P221776  | <i>Kif12</i>         | kinesin family member 12                                         | -1.55 |
| A_55_P2048110 | <i>Tmem97</i>        | transmembrane protein 97                                         | -1.55 |
| A_55_P2126814 | <i>Gm7560</i>        | predicted gene 7560                                              | -1.55 |
| A_55_P2169417 | <i>BC021767</i>      | cingulin-like                                                    | -1.55 |
| A_55_P2119155 | <i>Set</i>           | SET translocation                                                | -1.55 |
| A_55_P2025612 | <i>Psme2</i>         | proteasome (prosome. macropain) 28 subunit. beta                 | -1.55 |
| A_55_P2101696 | <i>Gnat2</i>         | guanine nucleotide binding protein. alpha transducing 2          | -1.54 |
| A_51_P198434  | <i>H2-K1</i>         | histocompatibility 2. K1. K region                               | -1.54 |
| A_55_P2090279 | <i>Drr1</i>          | developmentally regulated repeat element-containing transcript 1 | -1.54 |
| A_51_P196844  | <i>Osbpl3</i>        | oxysterol binding protein-like 3                                 | -1.54 |

|               |                      |                                                                     |       |
|---------------|----------------------|---------------------------------------------------------------------|-------|
| A_52_P514061  | <i>Padi4</i>         | peptidyl arginine deiminase, type IV                                | -1.54 |
| A_51_P443508  | <i>Ppa1</i>          | pyrophosphatase (inorganic) 1                                       | -1.54 |
| A_51_P356931  | <i>Orc11</i>         | origin recognition complex, subunit 1-like ( <i>S.cerevisiae</i> )  | -1.54 |
| A_52_P195246  | <i>Esyt3</i>         | extended synaptotagmin-like protein 3                               | -1.54 |
| A_55_P2000521 | <i>Lonrf1</i>        | LON peptidase N-terminal domain and ring finger 1                   | -1.54 |
| A_52_P223704  | <i>Faah</i>          | fatty acid amide hydrolase                                          | -1.54 |
| A_51_P198434  | <i>H2-K1</i>         | histocompatibility 2. K1. K region                                  | -1.54 |
| A_51_P172085  | <i>Arhgdig</i>       | Rho GDP dissociation inhibitor (GDI) gamma                          | -1.54 |
| A_55_P1968178 | <i>Smaggp</i>        | small cell adhesion glycoprotein                                    | -1.54 |
| A_51_P463440  | <i>Elovl6</i>        | ELOVL family member 6. elongation of long chain fatty acids (yeast) | -1.54 |
| A_51_P239673  | <i>Hprt</i>          | hypoxanthine guanine phosphoribosyl transferase                     | -1.54 |
| A_51_P179258  | <i>Kif26b</i>        | kinesin family member 26B                                           | -1.53 |
| A_52_P604195  | <i>Mbp</i>           | myelin basic protein                                                | -1.53 |
| A_55_P2052281 | <i>Rnf208</i>        | ring finger protein 208                                             | -1.53 |
| A_51_P382688  | <i>Zmynd19</i>       | zinc finger, MYND domain containing 19                              | -1.53 |
| A_51_P198434  | <i>H2-K1</i>         | histocompatibility 2. K1. K region                                  | -1.53 |
| A_52_P162298  | <i>YdjC</i>          | YdjC homolog (bacterial)                                            | -1.53 |
| A_52_P50305   | <i>Ube2k</i>         | ubiquitin-conjugating enzyme E2K (UBC1 homolog, yeast)              | -1.53 |
| A_55_P1994947 | <i>Gm6097</i>        | macrophage migration inhibitory factor pseudogene                   | -1.53 |
| A_52_P317393  | <i>Gpr56</i>         | G protein-coupled receptor 56                                       | -1.52 |
| A_66_P133240  | <i>Hnrpll</i>        | heterogeneous nuclear ribonucleoprotein L-like                      | -1.52 |
| A_51_P241667  | <i>Prkdc</i>         | protein kinase, DNA activated, catalytic polypeptide                | -1.52 |
| A_52_P407692  | <i>H2afj</i>         | H2A histone family, member J                                        | -1.52 |
| A_51_P239673  | <i>Hprt</i>          | hypoxanthine guanine phosphoribosyl transferase                     | -1.52 |
| A_51_P141535  | <i>Oat</i>           | ornithine aminotransferase                                          | -1.52 |
| A_55_P2131438 | <i>Hist2h2aa2</i>    | histone cluster 2, H2aa2                                            | -1.52 |
| A_55_P2177998 | <i>Tmprss13</i>      | transmembrane protease, serine 13                                   | -1.52 |
| A_55_P2063471 | <i>Gm11814</i>       | lactate dehydrogenase A pseudogene                                  | -1.52 |
| A_51_P516728  | <i>Hap1</i>          | huntingtin-associated protein 1                                     | -1.52 |
| A_52_P556908  | <i>Dlx6</i>          | distal-less homeobox 6                                              | -1.52 |
| A_55_P2021266 | <i>Hpse</i>          | heparanase                                                          | -1.52 |
| A_52_P673499  | <i>Shmt1</i>         | serine hydroxymethyltransferase 1 (soluble)                         | -1.52 |
| A_51_P121252  | <i>Ints4</i>         | integrator complex subunit 4                                        | -1.51 |
| A_66_P121590  | <i>Prss22</i>        | protease, serine, 22                                                | -1.51 |
| A_51_P402193  | <i>Map3k1</i>        | mitogen-activated protein kinase kinase kinase 1                    | -1.51 |
| A_55_P2033250 | <i>Fdft1</i>         | farnesyl diphosphate farnesyl transferase 1                         | -1.51 |
| A_55_P2018417 | <i>Osbpl3</i>        | oxysterol binding protein-like 3                                    | -1.51 |
| A_52_P141583  | <i>H2afy</i>         | H2A histone family, member Y                                        | -1.51 |
| A_51_P198434  | <i>H2-K1</i>         | histocompatibility 2. K1. K region                                  | -1.51 |
| A_55_P2098697 | <i>Tnfaip2</i>       | tumor necrosis factor, alpha-induced protein 2                      | -1.51 |
| A_55_P2023912 | <i>LOC630896</i>     | similar to 3-phosphoglycerate dehydrogenase                         | -1.51 |
| A_55_P2115871 | <i>Inpp5j</i>        | inositol polyphosphate 5-phosphatase J                              | -1.51 |
| A_52_P480360  | <i>Dut</i>           | deoxyuridine triphosphatase                                         | -1.51 |
| A_51_P121252  | <i>Ints4</i>         | integrator complex subunit 4                                        | -1.51 |
| A_51_P211998  | <i>Sgms2</i>         | sphingomyelin synthase 2                                            | -1.51 |
| A_51_P198434  | <i>H2-K1</i>         | histocompatibility 2. K1. K region                                  | -1.51 |
| A_55_P2055557 | <i>Sdsl</i>          | serine dehydratase-like                                             | -1.51 |
| A_51_P121252  | <i>Ints4</i>         | integrator complex subunit 4                                        | -1.51 |
| A_51_P262230  | <i>A2ld1</i>         | AIG2-like domain 1                                                  | -1.51 |
| A_65_P11306   | <i>Gm4944</i>        | predicted gene 4944                                                 | -1.50 |
| A_51_P212390  | <i>Klk10</i>         | kallikrein related-peptidase 10                                     | -1.50 |
| A_55_P1979997 | <i>1700026L06Rik</i> | RIKEN cDNA 1700026L06 gene                                          | -1.50 |
| A_52_P545810  | <i>Lrrfip1</i>       | leucine rich repeat (in FLII) interacting protein 1                 | -1.50 |
