# Supplementary material
Source: PubMed Central journal article supplement (PMC3364926)
Supplement: supp_111.097089_biolreprod.111.097089-2.pdf [file supp_111.097089_biolreprod.111.097089-2.pdf]

**Filant et al., Supplemental Table S1. Primer information for qPCR analysis.**

| mRNA           | Primers (5'-3') | Product size              | GenBank accession number |             |
|----------------|-----------------|---------------------------|--------------------------|-------------|
| <i>Rpl13a</i>  | forward         | TTGCTTACCTGGGGCGTCT       | 87                       | NM_009438.4 |
|                | reverse         | CCTTTTCCTTCCGTTTCTCCTC    |                          |             |
| <i>Wnt4</i>    | forward         | ATCGAGGAGTGCCAATA         | 64                       | NM_009523.1 |
|                | reverse         | GGAGGGAGTCCAGTGTGGAA      |                          |             |
| <i>Wnt5a</i>   | forward         | GGCGGCTGCGGAGACAACAT      | 75                       | NM_009524.2 |
|                | reverse         | TCGTTCCCTTTCTCTAGCGTCCAC  |                          |             |
| <i>Wnt7a</i>   | forward         | ACAACACACACCAGTAGCACC     | 74                       | NM_009527.3 |
|                | reverse         | GTTACACTTGACGTAGCAGACCA   |                          |             |
| <i>Wnt11</i>   | forward         | GCCATGAAGGCTGCCGTAG       | 153                      | NM_009519.2 |
|                | reverse         | GATGGTGTGACTGATGGTGG      |                          |             |
| <i>Wnt16</i>   | forward         | CCAAGGAGACAGCATTTCATTTATG | 70                       | NM_053116.4 |
|                | reverse         | CTGCATGACCTGGTGACAGAGT    |                          |             |
| <i>Fzd6</i>    | forward         | CGCATCCCGTGCCCTTACCA      | 115                      | NM_008056.3 |
|                | reverse         | TTCCAACCCAGAAGACC         |                          |             |
| <i>Fzd10</i>   | forward         | ACAACCCAGGCAAGTTCACCA     | 118                      | NM_175284.3 |
|                | reverse         | GCCAGCCAGACCACAGCG        |                          |             |
| <i>Sfrp4</i>   | forward         | CTCTGTGCTGCGCTTCTT        | 79                       | NM_016687.3 |
|                | reverse         | GGGCTTGATGGGATCGT         |                          |             |
| <i>Msx1</i>    | forward         | GAGCTGGAGAAGCTGAAGA       | 75                       | NM_010835.2 |
|                | reverse         | GCCAAGAGGAAAAGAGAGG       |                          |             |
| <i>Msx2</i>    | forward         | CAGAACCGAAGGGCTAAGGCGA    | 118                      | NM_013601.2 |
|                | reverse         | GGGGTGAGTTGATAGGGAAGGGCA  |                          |             |
| <i>Ihh</i>     | forward         | TGGAATCATTGCCTCCCAGA      | 102                      | NM_010544.2 |
|                | reverse         | CAA AGGCTCAGGAGGCTGGA     |                          |             |
| <i>Fst</i>     | forward         | CTCTTCTGGCGTGCTTCT        | 88                       | NM_008046.2 |
|                | reverse         | GTCTTCCTCCTCCTCCTCT       |                          |             |
| <i>Fgf7</i>    | forward         | ACAGATCATGCTTCCACCTC      | 91                       | NM_008008.4 |
|                | reverse         | TTCACACTCGTAGCCGTTT       |                          |             |
| <i>Fgf10</i>   | forward         | TCCTTCTCCTCCTCCTCC        | 125                      | NM_008002.4 |
|                | reverse         | TTGCCGTTCTTCTCAATC        |                          |             |
| <i>Hgf</i>     | forward         | GCATTCCAACACAAACAAC       | 96                       | NM_010427.4 |
|                | reverse         | GAACCCAACCTTTCCTTTATC     |                          |             |
| <i>Fgfr2</i>   | forward         | TGTCTGGTCCTTCGGGGTGTT     | 125                      | NM_201601.2 |
|                | reverse         | TGGTGGGCTTGTCCATCCTGTGT   |                          |             |
| <i>Met</i>     | forward         | TGGTGCTGCTGTTGTCCTTGGT    | 124                      | NM_008591.2 |
|                | reverse         | TGGATGGGGGTTTCTGCCGTG     |                          |             |
| <i>Mmp2</i>    | forward         | TTCTCTGCGTCCTGTGCT        | 104                      | NM_008610.2 |
|                | reverse         | TGCCAACTCTTTGTCTGTTT      |                          |             |
| <i>Mmp7</i>    | forward         | CTCACCTGTTCTGCTTT         | 77                       | NM_010810.4 |
|                | reverse         | CTCACATCTCCAGCTTCT        |                          |             |
| <i>Adamts1</i> | forward         | CATTACCTTCTAACCTGTTCT     | 125                      | NM_009621.4 |
|                | reverse         | ACTTCTGGTCCCTTCTGCT       |                          |             |
| <i>Car2</i>    | forward         | AGAGAACTGGCACAAGGA        | 111                      | NM_009801.4 |
|                | reverse         | GATATGAGCAGAGGCTGTAGG     |                          |             |

| Gene         | Applied Biosystems assay identification for qPCR analysis |
|--------------|-----------------------------------------------------------|
| <i>Rn18S</i> | Hs99999901_s1                                             |
| <i>Foxa2</i> | Mm00839704_mH                                             |
