# Supplementary material
Source: PubMed Central journal article supplement (PMC3364926)
Supplement: supp_111.097089_biolreprod.111.097089-3.pdf [file supp_111.097089_biolreprod.111.097089-3.pdf]

## Filant et al., Supplemental Table S2. Genes increased by progesterone treatment.

| Probe Name    | Gene Symbol          | Gene Name                                                                         | Fold Change |
|---------------|----------------------|-----------------------------------------------------------------------------------|-------------|
| A_51_P298107  | <i>Vit</i>           | vitrin                                                                            | 11.05       |
| A_55_P2013236 | <i>S100g</i>         | S100 calcium binding protein G                                                    | 10.59       |
| A_55_P2111163 | <i>S100g</i>         | S100 calcium binding protein G                                                    | 10.19       |
| A_55_P2331804 | <i>AU015791</i>      | expressed sequence AU015791                                                       | 8.74        |
| A_51_P162162  | <i>Inmt</i>          | indolethylamine N-methyltransferase                                               | 7.53        |
| A_55_P2394308 | <i>Fst</i>           | follistatin                                                                       | 7.00        |
| A_55_P2083559 | <i>Hrk</i>           | harakiri. BCL2 interacting protein (contains only BH3 domain)                     | 6.91        |
| A_55_P2238965 | <i>Cwh43</i>         | cell wall biogenesis 43 C-terminal homolog ( <i>S. cerevisiae</i> )               | 6.83        |
| A_51_P302566  | <i>Maob</i>          | monoamine oxidase B                                                               | 6.40        |
| A_51_P155313  | <i>Gsto1</i>         | glutathione S-transferase omega 1                                                 | 6.31        |
| A_51_P353232  | <i>Tnnc2</i>         | troponin C2. fast                                                                 | 5.26        |
| A_52_P424784  | <i>Clstn2</i>        | calsyntenin 2                                                                     | 4.92        |
| A_55_P2021689 | <i>Chrdl2</i>        | chordin-like 2                                                                    | 4.90        |
| A_51_P277275  | <i>Rit2</i>          | Ras-like without CAAX 2                                                           | 4.86        |
| A_55_P2162910 | <i>Rtn1</i>          | reticulon 1                                                                       | 4.72        |
| A_52_P141628  | <i>Slc23a1</i>       | solute carrier family 23 (nucleobase transporters). member 1                      | 4.70        |
| A_51_P141926  | <i>Fxyd4</i>         | FXD domain-containing ion transport regulator 4                                   | 4.28        |
| A_51_P278653  | <i>Rprm</i>          | reprim. TP53 dependent G2 arrest mediator candidate                               | 4.25        |
| A_51_P259029  | <i>Dusp26</i>        | dual specificity phosphatase 26 (putative)                                        | 4.23        |
| A_52_P253179  | <i>Igfbp3</i>        | insulin-like growth factor binding protein 3                                      | 4.05        |
| A_55_P2002903 | <i>Smoc2</i>         | SPARC related modular calcium binding 2                                           | 3.83        |
| A_55_P2227355 | <i>Ptpro</i>         | protein tyrosine phosphatase. receptor type. 0                                    | 3.61        |
| A_66_P136813  | <i>6030408B16Rik</i> | RIKEN cDNA 6030408B16 gene                                                        | 3.58        |
| A_55_P2165414 | <i>Serpina1a</i>     | serine (or cysteine) peptidase inhibitor. clade A. member 1A                      | 3.55        |
| A_55_P2101088 | <i>Slc5a11</i>       | solute carrier family 5 (sodium/glucose cotransporter). member 11                 | 3.53        |
| A_51_P283344  | <i>1700011H14Rik</i> | RIKEN cDNA 1700011H14 gene                                                        | 3.52        |
| A_55_P1979833 | <i>Cited1</i>        | Cbp/p300-interacting transactivator with Glu/Asp-rich carboxy-terminal domain 1   | 3.49        |
| A_55_P2152225 | <i>lhh</i>           | Indian hedgehog                                                                   | 3.47        |
| A_55_P2045642 | <i>Stmn4</i>         | stathmin-like 4                                                                   | 3.41        |
| A_51_P356055  | <i>Grp</i>           | gastrin releasing peptide                                                         | 3.40        |
| A_66_P102374  | <i>Calb1</i>         | calbindin 1                                                                       | 3.40        |
| A_55_P2003483 | <i>Gldc</i>          | glycine decarboxylase                                                             | 3.37        |
| A_51_P440238  | <i>Ggt6</i>          | gamma-glutamyltransferase 6                                                       | 3.33        |
| A_55_P2090254 | <i>Sntg2</i>         | syntrophin. gamma 2                                                               | 3.31        |
| A_52_P153019  | <i>Ptgfr</i>         | prostaglandin F receptor                                                          | 3.30        |
| A_52_P319774  | <i>Kcnip4</i>        | Kv channel interacting protein 4                                                  | 3.30        |
| A_55_P2046709 | <i>Gm8893</i>        | predicted gene 8893                                                               | 3.27        |
| A_55_P2010301 | <i>Serpina1c</i>     | serine (or cysteine) peptidase inhibitor. clade A. member 1C                      | 3.26        |
| A_52_P266132  | <i>Fgl2</i>          | fibrinogen-like protein 2                                                         | 3.17        |
| A_55_P2113857 | <i>Serpina1e</i>     | serine (or cysteine) peptidase inhibitor. clade A. member 1E                      | 3.13        |
| A_52_P426768  | <i>Cited4</i>        | Cbp/p300-interacting transactivator. with Glu/Asp-rich carboxy-terminal domain. 4 | 3.12        |
| A_51_P260683  | <i>Rgs1</i>          | regulator of G-protein signaling 1                                                | 3.03        |
| A_51_P199135  | <i>Cd83</i>          | CD83 antigen                                                                      | 3.02        |
| A_55_P1955147 | <i>Camk1d</i>        | calcium/calmodulin-dependent protein kinase 1D                                    | 3.01        |
| A_55_P2065529 | <i>Stk30</i>         | serine/threonine kinase 30                                                        | 3.01        |
| A_55_P2032643 | <i>Ajap1</i>         | adherens junction associated protein 1                                            | 3.01        |
| A_66_P127070  | <i>Gdf5</i>          | growth differentiation factor 5                                                   | 2.97        |
| A_51_P246317  | <i>Mt2</i>           | metallothionein 2                                                                 | 2.92        |
| A_55_P2045682 | <i>Rassf5</i>        | Ras association (RalGDS/AF-6) domain family member 5                              | 2.91        |
| A_55_P2010292 | <i>Serpina1e</i>     | serine (or cysteine) peptidase inhibitor. clade A. member 1E                      | 2.91        |
| A_51_P123625  | <i>Irg1</i>          | immunoresponsive gene 1                                                           | 2.90        |
| A_51_P135517  | <i>Coch</i>          | coagulation factor C homolog ( <i>Limulus polyphemus</i> )                        | 2.85        |
| A_51_P283473  | <i>Fibin</i>         | fin bud initiation factor homolog (zebrafish)                                     | 2.80        |
| A_55_P2002998 | <i>Olah</i>          | oleoyl-ACP hydrolase                                                              | 2.80        |
| A_51_P194249  | <i>Stmn4</i>         | stathmin-like 4                                                                   | 2.79        |
| A_55_P2054132 | <i>Tulp2</i>         | tubby-like protein 2                                                              | 2.77        |
| A_55_P2010298 | <i>Serpina1d</i>     | serine (or cysteine) peptidase inhibitor. clade A. member 1D                      | 2.77        |
| A_51_P123625  | <i>Irg1</i>          | immunoresponsive gene 1                                                           | 2.76        |
| A_55_P1966204 | <i>Cxcl12</i>        | chemokine (C-X-C motif) ligand 12                                                 | 2.76        |
| A_55_P1988699 | <i>Cacna2d1</i>      | calcium channel. voltage-dependent. alpha2/delta subunit 1                        | 2.75        |
| A_55_P2123502 | <i>Jam2</i>          | junction adhesion molecule 2                                                      | 2.75        |
| A_55_P2100485 | <i>Epha8</i>         | Eph receptor A8                                                                   | 2.74        |
| A_55_P2024155 | <i>Zbtb16</i>        | zinc finger and BTB domain containing 16                                          | 2.74        |
| A_55_P1962305 | <i>Plac8</i>         | placenta-specific 8                                                               | 2.74        |
| A_55_P1967677 | <i>A430107013Rik</i> | RIKEN cDNA A430107013 gene                                                        | 2.72        |

|               |                      |                                                                            |      |
|---------------|----------------------|----------------------------------------------------------------------------|------|
| A_51_P429903  | <i>Ndp</i>           | Norrie disease (pseudoglioma) (human)                                      | 2.71 |
| A_51_P123625  | <i>Irg1</i>          | immunoresponsive gene 1                                                    | 2.69 |
| A_55_P1955627 | <i>Chrdl1</i>        | chordin-like 1                                                             | 2.67 |
| A_55_P2053324 | <i>Acbd7</i>         | acyl-Coenzyme A binding domain containing 7                                | 2.67 |
| A_51_P123625  | <i>Irg1</i>          | immunoresponsive gene 1                                                    | 2.64 |
| A_51_P419286  | <i>Batf3</i>         | basic leucine zipper transcription factor. ATF-like 3                      | 2.63 |
| A_55_P2054708 | <i>LOC100044824</i>  | hypothetical protein LOC100044824                                          | 2.62 |
| A_66_P119376  | <i>Kctd12</i>        | potassium channel tetramerisation domain containing 12                     | 2.59 |
| A_55_P2017939 | <i>Lamc3</i>         | laminin gamma 3                                                            | 2.58 |
| A_66_P133383  | <i>C030048H21Rik</i> | RIKEN cDNA C030048H21 gene                                                 | 2.57 |
| A_51_P246924  | <i>Tppp3</i>         | tubulin polymerization-promoting protein family member 3                   | 2.55 |
| A_51_P246854  | <i>Acta1</i>         | actin. alpha 1. skeletal muscle                                            | 2.54 |
| A_55_P1962084 | <i>Hist2h2aa1</i>    | histone cluster 2. H2aa1                                                   | 2.54 |
| A_55_P2006300 | <i>Krt12</i>         | keratin 12                                                                 | 2.53 |
| A_52_P124472  | <i>Kcnd2</i>         | potassium voltage-gated channel. Shal-related family. member 2             | 2.53 |
| A_51_P123625  | <i>Irg1</i>          | immunoresponsive gene 1                                                    | 2.52 |
| A_55_P2173333 | <i>Plcb4</i>         | phospholipase C. beta 4                                                    | 2.52 |
| A_51_P283499  | <i>Drd4</i>          | dopamine receptor D4                                                       | 2.51 |
| A_52_P354744  | <i>Slc2a3</i>        | solute carrier family 2 (facilitated glucose transporter). member 3        | 2.50 |
| A_51_P123625  | <i>Irg1</i>          | immunoresponsive gene 1                                                    | 2.48 |
| A_51_P457196  | <i>Sfrp4</i>         | secreted frizzled-related protein 4                                        | 2.46 |
| A_51_P437135  | <i>Dab1</i>          | disabled homolog 1 (Drosophila)                                            | 2.46 |
| A_51_P398260  | <i>Tppp</i>          | tubulin polymerization promoting protein                                   | 2.43 |
| A_51_P157042  | <i>Ctgf</i>          | connective tissue growth factor                                            | 2.43 |
| A_66_P124091  | <i>Chrdl1</i>        | chordin-like 1                                                             | 2.42 |
| A_55_P1962901 | <i>Osr1</i>          | odd-skipped related 1 (Drosophila)                                         | 2.42 |
| A_55_P2006722 | <i>Cxcl17</i>        | chemokine (C-X-C motif) ligand 17                                          | 2.42 |
| A_51_P160439  | <i>Crybg3</i>        | beta-gamma crystallin domain containing 3                                  | 2.41 |
| A_55_P2044242 | <i>Slc13a5</i>       | solute carrier family 13 (sodium-dependent citrate transporter). member 5  | 2.40 |
| A_51_P123625  | <i>Irg1</i>          | immunoresponsive gene 1                                                    | 2.40 |
| A_51_P423518  | <i>Amph</i>          | amphiphysin                                                                | 2.39 |
| A_52_P378968  | <i>Rgs2</i>          | regulator of G-protein signaling 2                                         | 2.39 |
| A_55_P2028365 | <i>Lrrc36</i>        | leucine rich repeat containing 36                                          | 2.38 |
| A_51_P304478  | <i>Fam155a</i>       | family with sequence similarity 155. member A                              | 2.38 |
| A_55_P1965160 | <i>Tdrd5</i>         | tudor domain containing 5                                                  | 2.37 |
| A_55_P1963011 | <i>Slc26a7</i>       | solute carrier family 26. member 7                                         | 2.37 |
| A_55_P2016069 | <i>Adamts1</i>       | ADAMTS-like 1                                                              | 2.37 |
| A_55_P2052062 | <i>Cd200</i>         | CD200 antigen                                                              | 2.35 |
| A_51_P348665  | <i>Ramp1</i>         | receptor (calcitonin) activity modifying protein 1                         | 2.35 |
| A_52_P164797  | <i>Lct</i>           | lactase                                                                    | 2.34 |
| A_55_P2181542 | <i>Sult1d1</i>       | sulfotransferase family 1D. member 1                                       | 2.33 |
| A_55_P2040893 | <i>Tnni2</i>         | troponin I. skeletal. fast 2                                               | 2.33 |
| A_55_P1962304 | <i>Plac8</i>         | placenta-specific 8                                                        | 2.33 |
| A_55_P2093705 | <i>Meig1</i>         | meiosis expressed gene 1                                                   | 2.31 |
| A_52_P579531  | <i>Pdlim3</i>        | PDZ and LIM domain 3                                                       | 2.31 |
| A_51_P116651  | <i>Dpt</i>           | dermatopontin                                                              | 2.30 |
| A_52_P659312  | <i>Spsb4</i>         | splA/ryanodine receptor domain and SOCS box containing 4                   | 2.29 |
| A_51_P255699  | <i>Mmp3</i>          | matrix metalloproteinase 3                                                 | 2.29 |
| A_52_P553890  | <i>Itgb3</i>         | integrin beta 3                                                            | 2.29 |
| A_51_P116651  | <i>Dpt</i>           | dermatopontin                                                              | 2.29 |
| A_55_P2119969 | <i>Bdh2</i>          | 3-hydroxybutyrate dehydrogenase. type 2                                    | 2.28 |
| A_66_P139546  | <i>Igfbp6</i>        | insulin-like growth factor binding protein 6                               | 2.27 |
| A_51_P116651  | <i>Dpt</i>           | dermatopontin                                                              | 2.26 |
| A_51_P497395  | <i>Lypd1</i>         | Ly6/Plaur domain containing 1                                              | 2.26 |
| A_66_P122219  | <i>Kcnd3</i>         | potassium voltage-gated channel. Shal-related family. member 3             | 2.26 |
| A_51_P116651  | <i>Dpt</i>           | dermatopontin                                                              | 2.25 |
| A_51_P116651  | <i>Dpt</i>           | dermatopontin                                                              | 2.25 |
| A_51_P267494  | <i>Cdc42ep3</i>      | CDC42 effector protein (Rho GTPase binding) 3                              | 2.25 |
| A_55_P2234361 | <i>Rnf150</i>        | ring finger protein 150                                                    | 2.25 |
| A_51_P342773  | <i>Vipr2</i>         | vasoactive intestinal peptide receptor 2                                   | 2.24 |
| A_55_P2041700 | <i>Hoxa11as</i>      | HOXA11 antisense RNA (non-protein coding)                                  | 2.23 |
| A_51_P325223  | <i>Lin7b</i>         | lin-7 homolog B (C. elegans)                                               | 2.23 |
| A_51_P394814  | <i>Svep1</i>         | sushi. von Willebrand factor type A. EGF and pentraxin domain containing 1 | 2.23 |
| A_55_P2005853 | <i>Nacc2</i>         | nucleus accumbens associated 2. BEN and BTB (POZ) domain containing        | 2.23 |
| A_55_P2013371 | <i>Ttc29</i>         | tetratricopeptide repeat domain 29                                         | 2.22 |
| A_55_P2026530 | <i>Erc2</i>          | ELKS/RAB6-interacting/CAST family member 2                                 | 2.22 |
| A_55_P2173952 | <i>Myh6</i>          | myosin. heavy polypeptide 6. cardiac muscle. alpha                         | 2.21 |

|               |                      |                                                                     |      |
|---------------|----------------------|---------------------------------------------------------------------|------|
| A_51_P301809  | <i>Slit3</i>         | slit homolog 3 (Drosophila)                                         | 2.20 |
| A_55_P2086978 | <i>Col23a1</i>       | collagen. type XXIII. alpha 1                                       | 2.20 |
| A_55_P2092671 | <i>Nppc</i>          | natriuretic peptide precursor type C                                | 2.20 |
| A_51_P116651  | <i>Dpt</i>           | dermatopontin                                                       | 2.19 |
| A_51_P392687  | <i>Vim</i>           | vimentin                                                            | 2.18 |
| A_51_P213099  | <i>Ntng1</i>         | netrin G1                                                           | 2.18 |
| A_55_P2045896 | <i>Gdnf</i>          | glial cell line derived neurotrophic factor                         | 2.16 |
| A_51_P116651  | <i>Dpt</i>           | dermatopontin                                                       | 2.16 |
| A_55_P2010312 | <i>Serpina1a</i>     | serine (or cysteine) peptidase inhibitor. clade A. member 1A        | 2.15 |
| A_52_P369123  | <i>Fam189a2</i>      | family with sequence similarity 189. member A2                      | 2.15 |
| A_51_P345649  | <i>Pdgfra</i>        | platelet derived growth factor receptor. alpha polypeptide          | 2.14 |
| A_55_P2109122 | <i>Hist1h2bc</i>     | histone cluster 1. H2bc                                             | 2.14 |
| A_51_P116651  | <i>Dpt</i>           | dermatopontin                                                       | 2.13 |
| A_55_P2013601 | <i>Ldb2</i>          | LIM domain binding 2                                                | 2.13 |
| A_55_P2147566 | <i>Tac2</i>          | tachykinin 2                                                        | 2.12 |
| A_51_P116651  | <i>Dpt</i>           | dermatopontin                                                       | 2.12 |
| A_52_P463977  | <i>Tmem140</i>       | transmembrane protein 140                                           | 2.11 |
| A_51_P172054  | <i>Gas6</i>          | growth arrest specific 6                                            | 2.11 |
| A_52_P522372  | <i>Aard</i>          | alanine and arginine rich domain containing protein                 | 2.10 |
| A_55_P2143251 |                      |                                                                     | 2.10 |
| A_55_P2158946 | <i>Lama2</i>         | laminin. alpha 2                                                    | 2.10 |
| A_55_P2006008 | <i>Serpina1a</i>     | serine (or cysteine) peptidase inhibitor. clade B. member 1a        | 2.09 |
| A_55_P2064328 | <i>Lama2</i>         | laminin. alpha 2                                                    | 2.09 |
| A_52_P379277  | <i>Enpp3</i>         | ectonucleotide pyrophosphatase/phosphodiesterase 3                  | 2.09 |
| A_51_P345649  | <i>Pdgfra</i>        | platelet derived growth factor receptor. alpha polypeptide          | 2.09 |
| A_51_P142515  | <i>Antxr2</i>        | anthrax toxin receptor 2                                            | 2.08 |
| A_55_P2169829 | <i>3632451006Rik</i> | RIKEN cDNA 3632451006 gene                                          | 2.08 |
| A_51_P345649  | <i>Pdgfra</i>        | platelet derived growth factor receptor. alpha polypeptide          | 2.08 |
| A_51_P220150  | <i>Angptl7</i>       | angiopoietin-like 7                                                 | 2.08 |
| A_51_P345649  | <i>Pdgfra</i>        | platelet derived growth factor receptor. alpha polypeptide          | 2.08 |
| A_55_P2064043 | <i>Cd44</i>          | CD44 antigen                                                        | 2.08 |
| A_51_P345649  | <i>Pdgfra</i>        | platelet derived growth factor receptor. alpha polypeptide          | 2.08 |
| A_51_P116651  | <i>Dpt</i>           | dermatopontin                                                       | 2.07 |
| A_55_P2163659 | <i>Rspo3</i>         | R-spondin 3 homolog (Xenopus laevis)                                | 2.07 |
| A_55_P1975245 | <i>3110047P20Rik</i> | RIKEN cDNA 3110047P20 gene                                          | 2.05 |
| A_55_P2143494 | <i>Doc2b</i>         | double C2. beta                                                     | 2.05 |
| A_51_P194498  | <i>Wfdc1</i>         | WAP four-disulfide core domain 1                                    | 2.05 |
| A_51_P345649  | <i>Pdgfra</i>        | platelet derived growth factor receptor. alpha polypeptide          | 2.05 |
| A_51_P498720  | <i>Cacna2d1</i>      | calcium channel. voltage-dependent. alpha2/delta subunit 1          | 2.05 |
| A_51_P251209  | <i>Cacna1d</i>       | calcium channel. voltage-dependent. L type. alpha 1D subunit        | 2.04 |
| A_51_P516133  | <i>Hist1h1c</i>      | histone cluster 1. H1c                                              | 2.04 |
| A_55_P2136657 | <i>Thbs3</i>         | thrombospondin 3                                                    | 2.04 |
| A_66_P138929  | <i>Lox</i>           | lysyl oxidase                                                       | 2.04 |
| A_51_P115005  | <i>Edn1</i>          | endothelin 1                                                        | 2.04 |
| A_51_P345649  | <i>Pdgfra</i>        | platelet derived growth factor receptor. alpha polypeptide          | 2.04 |
| A_52_P478394  | <i>Dleu7</i>         | deleted in lymphocytic leukemia. 7                                  | 2.04 |
| A_55_P1968703 | <i>Gfra2</i>         | glial cell line derived neurotrophic factor family receptor alpha 2 | 2.03 |
| A_51_P315042  | <i>Avpr1a</i>        | arginine vasopressin receptor 1A                                    | 2.03 |
| A_55_P1964348 | <i>Gdpd2</i>         | glycerophosphodiester phosphodiesterase domain containing 2         | 2.03 |
| A_51_P112817  | <i>Cyp27a1</i>       | cytochrome P450. family 27. subfamily a. polypeptide 1              | 2.02 |
| A_55_P2109857 | <i>Rgs2</i>          | regulator of G-protein signaling 2                                  | 2.02 |
| A_52_P527625  | <i>Colec12</i>       | collectin sub-family member 12                                      | 2.02 |
| A_51_P345649  | <i>Pdgfra</i>        | platelet derived growth factor receptor. alpha polypeptide          | 2.02 |
| A_55_P2052690 | <i>Synn</i>          | synemin. intermediate filament protein                              | 2.02 |
| A_51_P115005  | <i>Edn1</i>          | endothelin 1                                                        | 2.01 |
| A_55_P2111790 | <i>Gem</i>           | GTP binding protein (gene overexpressed in skeletal muscle)         | 2.01 |
| A_55_P2181753 | <i>Bdh1</i>          | 3-hydroxybutyrate dehydrogenase. type 1                             | 2.01 |
| A_52_P121502  | <i>Pllp</i>          | plasma membrane proteolipid                                         | 2.00 |
| A_51_P412966  | <i>Lrrn1</i>         | leucine rich repeat protein 1. neuronal                             | 2.00 |
| A_52_P156190  | <i>Ednra</i>         | endothelin receptor type A                                          | 2.00 |
| A_55_P2078670 | <i>Cbs</i>           | cystathionine beta-synthase                                         | 2.00 |
| A_55_P2063465 | <i>Thbs3</i>         | thrombospondin 3                                                    | 2.00 |
| A_51_P115005  | <i>Edn1</i>          | endothelin 1                                                        | 2.00 |
| A_55_P2140118 | <i>Qpct</i>          | glutaminyl-peptide cyclotransferase (glutaminyl cyclase)            | 1.99 |
| A_51_P207988  | <i>Ptger4</i>        | prostaglandin E receptor 4 (subtype EP4)                            | 1.99 |
| A_51_P345649  | <i>Pdgfra</i>        | platelet derived growth factor receptor. alpha polypeptide          | 1.99 |
| A_51_P503131  | <i>Wnt11</i>         | wingless-related MMTV integration site 11                           | 1.99 |
| A_51_P274073  |                      |                                                                     | 1.99 |
| A_51_P345649  | <i>Pdgfra</i>        | platelet derived growth factor receptor. alpha polypeptide          | 1.97 |

|               |                      |                                                                                                |      |
|---------------|----------------------|------------------------------------------------------------------------------------------------|------|
| A_51_P301930  | <i>Lrrc17</i>        | leucine rich repeat containing 17                                                              | 1.97 |
| A_51_P484111  | <i>Matn2</i>         | matrilin 2                                                                                     | 1.97 |
| A_51_P213099  | <i>Ntng1</i>         | netrin G1                                                                                      | 1.97 |
| A_55_P2207255 | <i>Srpx</i>          | sushi-repeat-containing protein                                                                | 1.96 |
| A_51_P430423  | <i>Ada</i>           | adenosine deaminase                                                                            | 1.96 |
| A_51_P253984  | <i>Pcp4</i>          | Purkinje cell protein 4                                                                        | 1.96 |
| A_51_P229498  | <i>Lrfr2</i>         | leucine rich repeat and fibronectin type III domain containing 2                               | 1.96 |
| A_51_P115005  | <i>Edn1</i>          | endothelin 1                                                                                   | 1.95 |
| A_52_P23225   | <i>Gpc3</i>          | glypican 3                                                                                     | 1.95 |
| A_55_P2123683 | <i>Chrd1</i>         | chordin-like 1                                                                                 | 1.95 |
| A_66_P111660  | <i>Mt1</i>           | metallothionein 1                                                                              | 1.95 |
| A_55_P2164841 | <i>Gm5780</i>        | predicted gene 5780                                                                            | 1.95 |
| A_52_P220879  | <i>Tgm2</i>          | transglutaminase 2. C polypeptide                                                              | 1.94 |
| A_51_P257934  | <i>Tnfsf13b</i>      | tumor necrosis factor (ligand) superfamily. member 13b                                         | 1.94 |
| A_55_P2015541 | <i>Hif3a</i>         | hypoxia inducible factor 3. alpha subunit                                                      | 1.93 |
| A_55_P1970234 | <i>Dclk2</i>         | doublecortin-like kinase 2                                                                     | 1.93 |
| A_55_P2121275 | <i>Gm4907</i>        | predicted gene 4907                                                                            | 1.92 |
| A_52_P384718  | <i>Cdh10</i>         | cadherin 10                                                                                    | 1.92 |
| A_55_P1966102 | <i>Nme5</i>          | non-metastatic cells 5. protein expressed in (nucleoside-diphosphate kinase)                   | 1.91 |
| A_51_P109840  | <i>Vtn</i>           | vitronectin                                                                                    | 1.91 |
| A_55_P2161702 | <i>Nrip2</i>         | nuclear receptor interacting protein 2                                                         | 1.91 |
| A_51_P142744  | <i>Sulf1</i>         | sulfatase 1                                                                                    | 1.90 |
| A_55_P2003541 | <i>Nrcam</i>         | neuron-glia-CAM-related cell adhesion molecule                                                 | 1.90 |
| A_65_P03197   | <i>AW551984</i>      | expressed sequence AW551984                                                                    | 1.90 |
| A_55_P2128869 | <i>Ccdc80</i>        | coiled-coil domain containing 80                                                               | 1.90 |
| A_51_P146633  |                      |                                                                                                | 1.89 |
| A_55_P2043337 | <i>Colq</i>          | collagen-like tail subunit (single strand of homotrimer) of asymmetric acetylcholinesterase    | 1.89 |
| A_66_P118600  | <i>Lama1</i>         | laminin. alpha 1                                                                               | 1.89 |
| A_51_P131164  | <i>Enkur</i>         | enkurin. TRPC channel interacting protein                                                      | 1.89 |
| A_51_P173709  | <i>Gprc5b</i>        | G protein-coupled receptor. family C. group 5. member B                                        | 1.89 |
| A_52_P544043  | <i>Pcsk5</i>         | proprotein convertase subtilisin/kexin type 5                                                  | 1.89 |
| A_51_P213099  | <i>Ntng1</i>         | netrin G1                                                                                      | 1.89 |
| A_52_P489295  | <i>Adamts1</i>       | a disintegrin-like and metalloproteinase (reprolysin type) with thrombospondin type 1 motif. 1 | 1.88 |
| A_51_P180140  | <i>Hist1h2ba</i>     | histone cluster 1. H2ba                                                                        | 1.88 |
| A_51_P231549  | <i>Mill2</i>         | MHC I like leukocyte 2                                                                         | 1.88 |
| A_55_P1957424 | <i>Sulf1</i>         | sulfatase 1                                                                                    | 1.88 |
| A_51_P115005  | <i>Edn1</i>          | endothelin 1                                                                                   | 1.88 |
| A_55_P2028474 | <i>Adam22</i>        | a disintegrin and metalloproteinase domain 22                                                  | 1.87 |
| A_55_P2378486 | <i>Kcnma1</i>        | potassium large conductance calcium-activated channel. subfamily M. alpha member 1             | 1.87 |
| A_51_P291417  | <i>Thbd</i>          | thrombomodulin                                                                                 | 1.87 |
| A_52_P231428  | <i>A430107013Rik</i> | RIKEN cDNA A430107013 gene                                                                     | 1.87 |
| A_52_P392216  | <i>Dab1</i>          | disabled homolog 1 (Drosophila)                                                                | 1.86 |
| A_51_P213099  | <i>Ntng1</i>         | netrin G1                                                                                      | 1.85 |
| A_55_P2092286 | <i>LOC100048780</i>  | similar to MRC OX-2 antigen homolog                                                            | 1.84 |
| A_55_P2179027 | <i>Gem</i>           | GTP binding protein (gene overexpressed in skeletal muscle)                                    | 1.84 |
| A_55_P2022049 | <i>Klf15</i>         | Kruppel-like factor 15                                                                         | 1.84 |
| A_51_P396978  | <i>Kcnip4</i>        | Kv channel interacting protein 4                                                               | 1.84 |
| A_55_P2119257 | <i>Serpine1</i>      | serine (or cysteine) peptidase inhibitor. clade E. member 1                                    | 1.83 |
| A_51_P110672  | <i>Mst1r</i>         | macrophage stimulating 1 receptor (c-met-related tyrosine kinase)                              | 1.83 |
| A_55_P1985433 | <i>Nrg1</i>          | neuregulin 1                                                                                   | 1.83 |
| A_55_P2146495 |                      |                                                                                                | 1.82 |
| A_51_P175580  | <i>Trp53inp1</i>     | transformation related protein 53 inducible nuclear protein 1                                  | 1.82 |
| A_55_P1961130 | <i>6130401L20Rik</i> | RIKEN cDNA 6130401L20 gene                                                                     | 1.82 |
| A_55_P2177154 | <i>Hist1h2bm</i>     | histone cluster 1. H2bm                                                                        | 1.82 |
| A_51_P218953  | <i>Zfp536</i>        | zinc finger protein 536                                                                        | 1.82 |
| A_55_P2005475 | <i>Sult1a1</i>       | sulfotransferase family 1A. phenol-preferring. member 1                                        | 1.82 |
| A_52_P145415  | <i>Ptch2</i>         | patched homolog 2                                                                              | 1.82 |
| A_51_P459944  | <i>Tcf21</i>         | transcription factor 21                                                                        | 1.81 |
| A_55_P2071656 | <i>Kcnma1</i>        | potassium large conductance calcium-activated channel. subfamily M. alpha member 1             | 1.81 |
| A_55_P1973352 |                      |                                                                                                | 1.81 |
| A_51_P168203  | <i>Aig1</i>          | androgen-induced 1                                                                             | 1.81 |
| A_55_P2112892 | <i>Dab1</i>          | disabled homolog 1 (Drosophila)                                                                | 1.81 |
| A_51_P288876  | <i>Tmem45a</i>       | transmembrane protein 45a                                                                      | 1.80 |
| A_51_P361448  | <i>Scara5</i>        | scavenger receptor class A. member 5 (putative)                                                | 1.80 |
| A_52_P565575  | <i>Arhgap20</i>      | Rho GTPase activating protein 20                                                               | 1.79 |
| A_51_P161248  | <i>Scg3</i>          | secretogranin III                                                                              | 1.78 |

|               |                      |                                                                                              |      |
|---------------|----------------------|----------------------------------------------------------------------------------------------|------|
| A_55_P2142251 | <i>Hist2h3c2-ps</i>  | histone cluster 2. H3c2. pseudogene                                                          | 1.78 |
| A_51_P515605  | <i>Col3a1</i>        | collagen. type III. alpha 1                                                                  | 1.78 |
| A_55_P2158227 | <i>Angpt1</i>        | angiopoietin 1                                                                               | 1.78 |
| A_55_P2181602 | <i>Calb1</i>         | calbindin 1                                                                                  | 1.78 |
| A_51_P213099  | <i>Ntng1</i>         | netrin G1                                                                                    | 1.78 |
| A_52_P674467  | <i>Lin7a</i>         | lin-7 homolog A ( <i>C. elegans</i> )                                                        | 1.78 |
| A_66_P114768  | <i>Bach2</i>         | BTB and CNC homology 2                                                                       | 1.77 |
| A_55_P2154387 | <i>Bmp4</i>          | bone morphogenetic protein 4                                                                 | 1.77 |
| A_52_P428745  | <i>Camk2d</i>        | calcium/calmodulin-dependent protein kinase II. delta                                        | 1.77 |
| A_51_P213099  | <i>Ntng1</i>         | netrin G1                                                                                    | 1.77 |
| A_51_P472249  | <i>Slc7a7</i>        | solute carrier family 7 (cationic amino acid transporter. y+ system). member 7               | 1.77 |
| A_55_P2027521 |                      |                                                                                              | 1.76 |
| A_55_P1977498 | <i>Htr2b</i>         | 5-hydroxytryptamine (serotonin) receptor 2B                                                  | 1.76 |
| A_55_P1998299 | <i>Itgb4</i>         | integrin beta 4                                                                              | 1.76 |
| A_55_P1984962 | <i>Gm2818</i>        | predicted gene 2818                                                                          | 1.76 |
| A_51_P472726  | <i>Pdlim2</i>        | PDZ and LIM domain 2                                                                         | 1.75 |
| A_51_P110672  | <i>Mst1r</i>         | macrophage stimulating 1 receptor (c-met-related tyrosine kinase)                            | 1.75 |
| A_55_P1958921 | <i>Ankrd29</i>       | ankyrin repeat domain 29                                                                     | 1.75 |
| A_55_P1984487 | <i>Adra2c</i>        | adrenergic receptor. alpha 2c                                                                | 1.75 |
| A_55_P1962154 | <i>Rarb</i>          | retinoic acid receptor. beta                                                                 | 1.75 |
| A_51_P110672  | <i>Mst1r</i>         | macrophage stimulating 1 receptor (c-met-related tyrosine kinase)                            | 1.75 |
| A_55_P2110915 | <i>Flrt1</i>         | fibronectin leucine rich transmembrane protein 1                                             | 1.74 |
| A_55_P1969615 | <i>Pnck</i>          | pregnancy upregulated non-ubiquitously expressed CaM kinase                                  | 1.74 |
| A_51_P110672  | <i>Mst1r</i>         | macrophage stimulating 1 receptor (c-met-related tyrosine kinase)                            | 1.74 |
| A_55_P1963364 | <i>Fam55c</i>        | family with sequence similarity 55. member C                                                 | 1.74 |
| A_55_P1956593 | <i>Plekha4</i>       | pleckstrin homology domain containing. family A (phosphoinositide binding specific) member 4 | 1.74 |
| A_55_P2206514 | <i>LOC624549</i>     | hypothetical protein LOC624549                                                               | 1.74 |
| A_55_P2381926 | <i>Jam2</i>          | junction adhesion molecule 2                                                                 | 1.74 |
| A_55_P1989341 | <i>Ntng1</i>         | netrin G1                                                                                    | 1.74 |
| A_55_P2061273 | <i>Tbx6</i>          | T-box 6                                                                                      | 1.74 |
| A_51_P110672  | <i>Mst1r</i>         | macrophage stimulating 1 receptor (c-met-related tyrosine kinase)                            | 1.74 |
| A_55_P2157537 |                      |                                                                                              | 1.73 |
| A_55_P2074281 | <i>Nr2f1</i>         | nuclear receptor subfamily 2. group F. member 1                                              | 1.73 |
| A_51_P213691  | <i>Scnn1a</i>        | sodium channel. nonvoltage-gated 1 alpha                                                     | 1.73 |
| A_51_P110672  | <i>Mst1r</i>         | macrophage stimulating 1 receptor (c-met-related tyrosine kinase)                            | 1.73 |
| A_51_P481159  | <i>Cbr3</i>          | carbonyl reductase 3                                                                         | 1.73 |
| A_55_P2064741 | <i>Nmb</i>           | neuromedin B                                                                                 | 1.72 |
| A_51_P333111  | <i>Aox1</i>          | aldehyde oxidase 1                                                                           | 1.72 |
| A_51_P111962  | <i>Bean</i>          | brain expressed. associated with Nedd4                                                       | 1.72 |
| A_66_P123155  | <i>Ddo</i>           | D-aspartate oxidase                                                                          | 1.72 |
| A_51_P110672  | <i>Mst1r</i>         | macrophage stimulating 1 receptor (c-met-related tyrosine kinase)                            | 1.72 |
| A_55_P1960411 | <i>Lrrc23</i>        | leucine rich repeat containing 23                                                            | 1.72 |
| A_51_P460048  | <i>Cnrip1</i>        | cannabinoid receptor interacting protein 1                                                   | 1.72 |
| A_55_P1993777 | <i>D11Bwg0517e</i>   | DNA segment. Chr 11. Brigham & Women's Genetics 0517 expressed                               | 1.72 |
| A_51_P372550  | <i>Cgref1</i>        | cell growth regulator with EF hand domain 1                                                  | 1.72 |
| A_52_P149545  | <i>Tacr1</i>         | tachykinin receptor 1                                                                        | 1.71 |
| A_55_P2034864 | <i>Tubb2b</i>        | tubulin. beta 2B                                                                             | 1.71 |
| A_51_P110672  | <i>Mst1r</i>         | macrophage stimulating 1 receptor (c-met-related tyrosine kinase)                            | 1.71 |
| A_51_P473259  | <i>Dpyd</i>          | dihydropyrimidine dehydrogenase                                                              | 1.71 |
| A_52_P151393  | <i>AI646023</i>      | expressed sequence AI646023                                                                  | 1.71 |
| A_52_P454183  | <i>Olfml2b</i>       | olfactomedin-like 2B                                                                         | 1.71 |
| A_51_P508838  | <i>Kcne4</i>         | potassium voltage-gated channel. Isk-related subfamily. gene 4                               | 1.71 |
| A_51_P110672  | <i>Mst1r</i>         | macrophage stimulating 1 receptor (c-met-related tyrosine kinase)                            | 1.70 |
| A_52_P474089  | <i>Capn6</i>         | calpain 6                                                                                    | 1.70 |
| A_66_P121117  | <i>Serpina1d</i>     | serine (or cysteine) peptidase inhibitor. clade A. member 1D                                 | 1.70 |
| A_51_P343833  | <i>Traf1</i>         | TNF receptor-associated factor 1                                                             | 1.70 |
| A_55_P2181251 | <i>A430105I19Rik</i> | RIKEN cDNA A430105I19 gene                                                                   | 1.70 |
| A_51_P493117  | <i>Slc16a9</i>       | solute carrier family 16 (monocarboxylic acid transporters). member 9                        | 1.70 |
| A_51_P175567  | <i>Dact1</i>         | dapper homolog 1. antagonist of beta-catenin (xenopus)                                       | 1.70 |
| A_51_P452779  | <i>Pygl</i>          | liver glycogen phosphorylase                                                                 | 1.70 |
| A_52_P1042732 | <i>Akap5</i>         | A kinase (PRKA) anchor protein 5                                                             | 1.69 |
| A_55_P2340448 | <i>B230114P17Rik</i> | RIKEN cDNA B230114P17 gene                                                                   | 1.69 |
| A_55_P2017636 | <i>Thbs1</i>         | thrombospondin 1                                                                             | 1.69 |
| A_51_P473953  | <i>4631416L12Rik</i> | RIKEN cDNA 4631416L12 gene                                                                   | 1.69 |
| A_51_P217498  | <i>Slc2a4</i>        | solute carrier family 2 (facilitated glucose transporter). member 4                          | 1.69 |
| A_51_P110672  | <i>Mst1r</i>         | macrophage stimulating 1 receptor (c-met-related tyrosine kinase)                            | 1.69 |

|               |                      |                                                                                               |      |
|---------------|----------------------|-----------------------------------------------------------------------------------------------|------|
| A_51_P185593  | <i>Synm</i>          | synemin. intermediate filament protein                                                        | 1.69 |
| A_55_P1990210 | <i>Scpep1</i>        | serine carboxypeptidase 1                                                                     | 1.69 |
| A_55_P2062777 | <i>Mfap5</i>         | microfibrillar associated protein 5                                                           | 1.69 |
| A_51_P432460  | <i>Ppp1r14a</i>      | protein phosphatase 1. regulatory (inhibitor) subunit 14A                                     | 1.68 |
| A_51_P513941  | <i>Lrpap1</i>        | low density lipoprotein receptor-related protein associated protein 1                         | 1.68 |
| A_55_P1974645 | <i>Entpd2</i>        | ectonucleoside triphosphate diphosphohydrolase 2                                              | 1.68 |
| A_52_P334562  | <i>Vdr</i>           | vitamin D receptor                                                                            | 1.68 |
| A_51_P190254  | <i>Scrn1</i>         | secernin 1                                                                                    | 1.67 |
| A_55_P1999902 | <i>Pip5k1a</i>       | phosphatidylinositol-4-phosphate 5-kinase. type 1 alpha                                       | 1.67 |
| A_55_P2088625 | <i>Fbln7</i>         | fibulin 7                                                                                     | 1.67 |
| A_55_P1989076 | <i>Slc22a23</i>      | solute carrier family 22. member 23                                                           | 1.67 |
| A_51_P497317  | <i>Tcp11l2</i>       | t-complex 11 (mouse) like 2                                                                   | 1.67 |
| A_51_P217498  | <i>Slc2a4</i>        | solute carrier family 2 (facilitated glucose transporter). member 4                           | 1.67 |
| A_55_P2041141 | <i>Speer4c</i>       | spermatogenesis associated glutamate (E)-rich protein 4c                                      | 1.66 |
| A_52_P175376  | <i>Tcfcp2l1</i>      | transcription factor CP2-like 1                                                               | 1.66 |
| A_51_P220806  | <i>Gdf9</i>          | growth differentiation factor 9                                                               | 1.66 |
| A_55_P1987725 | <i>Gria4</i>         | glutamate receptor. ionotropic. AMPA4 (alpha 4)                                               | 1.66 |
| A_51_P217498  | <i>Slc2a4</i>        | solute carrier family 2 (facilitated glucose transporter). member 4                           | 1.66 |
| A_51_P392005  | <i>Car8</i>          | carbonic anhydrase 8                                                                          | 1.65 |
| A_51_P452153  | <i>2010001M09Rik</i> | RIKEN cDNA 2010001M09 gene                                                                    | 1.65 |
| A_52_P225898  | <i>Kcnj8</i>         | potassium inwardly-rectifying channel. subfamily J. member 8                                  | 1.65 |
| A_52_P577388  | <i>Epdrl</i>         | ependymin related protein 1 (zebrafish)                                                       | 1.65 |
| A_55_P2361647 | <i>4831440E17Rik</i> | RIKEN cDNA 4831440E17 gene                                                                    | 1.65 |
| A_52_P357133  | <i>Selm</i>          | selenoprotein M                                                                               | 1.65 |
| A_52_P354823  | <i>Irf8</i>          | interferon regulatory factor 8                                                                | 1.65 |
| A_51_P217498  | <i>Slc2a4</i>        | solute carrier family 2 (facilitated glucose transporter). member 4                           | 1.65 |
| A_51_P440327  | <i>Efhc1</i>         | EF-hand domain (C-terminal) containing 1                                                      | 1.65 |
| A_55_P2227321 | <i>Ptprd</i>         | protein tyrosine phosphatase. receptor type. D                                                | 1.65 |
| A_55_P2414524 | <i>1110002E22Rik</i> | RIKEN cDNA 1110002E22 gene                                                                    | 1.64 |
| A_55_P2159522 | <i>Col14a1</i>       | collagen. type XIV. alpha 1                                                                   | 1.64 |
| A_55_P2131288 | <i>Ank2</i>          | ankyrin 2. brain                                                                              | 1.64 |
| A_51_P288916  | <i>Tmtc2</i>         | transmembrane and tetratricopeptide repeat containing 2                                       | 1.64 |
| A_52_P172014  | <i>Ramp1</i>         | receptor (calcitonin) activity modifying protein 1                                            | 1.64 |
| A_51_P161830  | <i>Enpep</i>         | glutamyl aminopeptidase                                                                       | 1.64 |
| A_55_P1958906 | <i>Col17a1</i>       | collagen. type XVII. alpha 1                                                                  | 1.64 |
| A_51_P497100  | <i>Lgals4</i>        | lectin. galactose binding. soluble 4                                                          | 1.64 |
| A_55_P2011286 | <i>Hopx</i>          | HOP homeobox                                                                                  | 1.64 |
| A_51_P346165  | <i>Agpat4</i>        | 1-acylglycerol-3-phosphate O-acyltransferase 4 (lysophosphatidic acid acyltransferase. delta) | 1.64 |
| A_55_P2048348 | <i>Aig1</i>          | androgen-induced 1                                                                            | 1.64 |
| A_55_P2099448 | <i>Slc12a2</i>       | solute carrier family 12. member 2                                                            | 1.63 |
| A_55_P2116180 | <i>Mrqprf</i>        | MAS-related GPR. member F                                                                     | 1.63 |
| A_52_P512575  | <i>Hopx</i>          | HOP homeobox                                                                                  | 1.63 |
| A_55_P1984961 | <i>Gm2818</i>        | predicted gene 2818                                                                           | 1.63 |
| A_51_P115005  | <i>Edn1</i>          | endothelin 1                                                                                  | 1.63 |
| A_51_P217498  | <i>Slc2a4</i>        | solute carrier family 2 (facilitated glucose transporter). member 4                           | 1.63 |
| A_51_P204740  | <i>Cd34</i>          | CD34 antigen                                                                                  | 1.63 |
| A_51_P217498  | <i>Slc2a4</i>        | solute carrier family 2 (facilitated glucose transporter). member 4                           | 1.62 |
| A_55_P2011678 | <i>Pdzk1ip1</i>      | PDZK1 interacting protein 1                                                                   | 1.62 |
| A_55_P2146555 | <i>Slc2a12</i>       | solute carrier family 2 (facilitated glucose transporter). member 12                          | 1.62 |
| A_51_P233727  | <i>Ng23</i>          | Ng23 protein                                                                                  | 1.62 |
| A_55_P2120469 | <i>Armc2</i>         | armadillo repeat containing 2                                                                 | 1.62 |
| A_55_P1955437 | <i>Cmtm5</i>         | CKLF-like MARVEL transmembrane domain containing 5                                            | 1.61 |
| A_51_P296036  | <i>Nrbp2</i>         | nuclear receptor binding protein 2                                                            | 1.61 |
| A_55_P2011912 | <i>Ecm2</i>          | extracellular matrix protein 2. female organ and adipocyte specific                           | 1.61 |
| A_55_P2063256 | <i>Lgals4</i>        | lectin. galactose binding. soluble 4                                                          | 1.61 |
| A_51_P217498  | <i>Slc2a4</i>        | solute carrier family 2 (facilitated glucose transporter). member 4                           | 1.61 |
| A_51_P217498  | <i>Slc2a4</i>        | solute carrier family 2 (facilitated glucose transporter). member 4                           | 1.61 |
| A_51_P217498  | <i>Slc2a4</i>        | solute carrier family 2 (facilitated glucose transporter). member 4                           | 1.61 |
| A_66_P111430  | <i>2410006H16Rik</i> | RIKEN cDNA 2410006H16 gene                                                                    | 1.60 |
| A_55_P2025746 | <i>Adam5</i>         | a disintegrin and metallopeptidase domain 5                                                   | 1.60 |
| A_65_P06029   | <i>Fam171b</i>       | family with sequence similarity 171. member B                                                 | 1.60 |
| A_51_P109369  | <i>Fbxo32</i>        | F-box protein 32                                                                              | 1.60 |
| A_51_P217498  | <i>Slc2a4</i>        | solute carrier family 2 (facilitated glucose transporter). member 4                           | 1.60 |
| A_55_P2137466 | <i>Kcnu1</i>         | potassium channel. subfamily U. member 1                                                      | 1.60 |
| A_55_P1967201 | <i>Ryr3</i>          | ryanodine receptor 3                                                                          | 1.60 |
| A_55_P2018929 | <i>Spns2</i>         | spinster homolog 2 (Drosophila)                                                               | 1.60 |
| A_51_P109369  | <i>Fbxo32</i>        | F-box protein 32                                                                              | 1.59 |
| A_55_P2126269 | <i>Nmb</i>           | neuromedin B                                                                                  | 1.59 |

|               |                      |                                                                                             |      |
|---------------|----------------------|---------------------------------------------------------------------------------------------|------|
| A_51_P123655  | <i>Kera</i>          | keratocan                                                                                   | 1.59 |
| A_55_P1991475 | <i>Sesn1</i>         | sestrin 1                                                                                   | 1.59 |
| A_52_P525070  | <i>Vamp4</i>         | vesicle-associated membrane protein 4                                                       | 1.59 |
| A_52_P302345  | <i>Cyp4v3</i>        | cytochrome P450, family 4, subfamily v, polypeptide 3                                       | 1.59 |
| A_55_P2146520 | <i>Carns1</i>        | carnosine synthase 1                                                                        | 1.59 |
| A_52_P161495  | <i>Bcl6</i>          | B-cell leukemia/lymphoma 6                                                                  | 1.59 |
| A_52_P49321   | <i>Adamts9</i>       | a disintegrin-like and metallopeptidase (repolysin type) with thrombospondin type 1 motif 9 | 1.59 |
| A_55_P1983588 | <i>Pmepa1</i>        | prostate transmembrane protein, androgen induced 1                                          | 1.59 |
| A_51_P109369  | <i>Fbxo32</i>        | F-box protein 32                                                                            | 1.59 |
| A_51_P109369  | <i>Fbxo32</i>        | F-box protein 32                                                                            | 1.59 |
| A_52_P615375  | <i>Hist3h2a</i>      | histone cluster 3, H2a                                                                      | 1.58 |
| A_52_P552665  | <i>Fzd7</i>          | frizzled homolog 7 ( <i>Drosophila</i> )                                                    | 1.58 |
| A_55_P2043612 | <i>Prdm6</i>         | PR domain containing 6                                                                      | 1.58 |
| A_51_P109369  | <i>Fbxo32</i>        | F-box protein 32                                                                            | 1.58 |
| A_51_P109369  | <i>Fbxo32</i>        | F-box protein 32                                                                            | 1.58 |
| A_55_P1975215 | <i>Npas4</i>         | neuronal PAS domain protein 4                                                               | 1.58 |
| A_55_P2282969 | <i>LOC552880</i>     | hypothetical LOC552880                                                                      | 1.57 |
| A_51_P386899  | <i>Mfsd7c</i>        | major facilitator superfamily domain containing 7C                                          | 1.57 |
| A_51_P515532  | <i>Tmem200a</i>      | transmembrane protein 200A                                                                  | 1.57 |
| A_55_P2040026 | <i>Itga4</i>         | integrin alpha 4                                                                            | 1.57 |
| A_55_P2206605 | <i>5830444B04Rik</i> | RIKEN cDNA 5830444B04 gene                                                                  | 1.57 |
| A_55_P1961009 | <i>Apbb1ip</i>       | amyloid beta (A4) precursor protein-binding, family B, member 1 interacting protein         | 1.57 |
| A_52_P136782  | <i>Rgs5</i>          | regulator of G-protein signaling 5                                                          | 1.56 |
| A_55_P2160810 | <i>Foxd2</i>         | forkhead box D2                                                                             | 1.56 |
| A_51_P300506  | <i>Cox6b2</i>        | cytochrome c oxidase subunit VIb polypeptide 2                                              | 1.56 |
| A_55_P2051414 | <i>Axl</i>           | AXL receptor tyrosine kinase                                                                | 1.56 |
| A_66_P136714  | <i>Scpep1</i>        | serine carboxypeptidase 1                                                                   | 1.56 |
| A_51_P511511  | <i>Stk33</i>         | serine/threonine kinase 33                                                                  | 1.56 |
| A_51_P109369  | <i>Fbxo32</i>        | F-box protein 32                                                                            | 1.56 |
| A_55_P2013184 | <i>Atp2b3</i>        | ATPase, Ca <sup>++</sup> transporting, plasma membrane 3                                    | 1.56 |
| A_55_P2143693 | <i>Syt11</i>         | synaptotagmin-like 1                                                                        | 1.56 |
| A_51_P182257  | <i>1700019N12Rik</i> | RIKEN cDNA 1700019N12 gene                                                                  | 1.56 |
| A_51_P470328  | <i>Sepp1</i>         | selenoprotein P, plasma, 1                                                                  | 1.56 |
| A_51_P139069  | <i>Wdr45</i>         | WD repeat domain 45                                                                         | 1.56 |
| A_55_P2029846 | <i>BC031353</i>      | cDNA sequence BC031353                                                                      | 1.56 |
| A_51_P109369  | <i>Fbxo32</i>        | F-box protein 32                                                                            | 1.56 |
| A_51_P113403  | <i>Slc26a11</i>      | solute carrier family 26, member 11                                                         | 1.56 |
| A_65_P16059   | <i>Tgfr3</i>         | transforming growth factor, beta receptor III                                               | 1.56 |
| A_55_P1953846 | <i>Abca8b</i>        | ATP-binding cassette, sub-family A (ABC1), member 8b                                        | 1.56 |
| A_51_P107020  | <i>Kif5a</i>         | kinesin family member 5A                                                                    | 1.56 |
| A_55_P2053718 | <i>Pink1</i>         | PTEN induced putative kinase 1                                                              | 1.55 |
| A_51_P501844  | <i>Cyp26b1</i>       | cytochrome P450, family 26, subfamily b, polypeptide 1                                      | 1.55 |
| A_51_P514256  | <i>Tubb2b</i>        | tubulin, beta 2B                                                                            | 1.55 |
| A_52_P607683  | <i>Ppm1e</i>         | protein phosphatase 1E (PP2C domain containing)                                             | 1.55 |
| A_51_P113403  | <i>Slc26a11</i>      | solute carrier family 26, member 11                                                         | 1.55 |
| A_51_P116601  | <i>A330021E22Rik</i> | RIKEN cDNA A330021E22 gene                                                                  | 1.55 |
| A_55_P2067425 | <i>Dpf1</i>          | D4, zinc and double PHD fingers family 1                                                    | 1.55 |
| A_51_P213359  | <i>Has2</i>          | hyaluronan synthase 2                                                                       | 1.55 |
| A_51_P109369  | <i>Fbxo32</i>        | F-box protein 32                                                                            | 1.55 |
| A_55_P2082299 | <i>AA388235</i>      | expressed sequence AA388235                                                                 | 1.55 |
| A_51_P255456  | <i>Cyp1b1</i>        | cytochrome P450, family 1, subfamily b, polypeptide 1                                       | 1.55 |
| A_55_P2183777 | <i>Gm5296</i>        | predicted gene 5296                                                                         | 1.55 |
| A_52_P481279  | <i>Gm1060</i>        | predicted gene 1060                                                                         | 1.55 |
| A_55_P2126951 | <i>Zfp467</i>        | zinc finger protein 467                                                                     | 1.54 |
| A_55_P2063257 | <i>Lgals4</i>        | lectin, galactose binding, soluble 4                                                        | 1.54 |
| A_52_P596595  | <i>Pnma2</i>         | paraneoplastic antigen MA2                                                                  | 1.54 |
| A_55_P2040170 | <i>Pmp22</i>         | peripheral myelin protein 22                                                                | 1.54 |
| A_55_P2093704 | <i>Meig1</i>         | meiosis expressed gene 1                                                                    | 1.54 |
| A_66_P116860  | <i>5031434011Rik</i> | RIKEN cDNA 5031434011 gene                                                                  | 1.53 |
| A_55_P1966432 | <i>Gstm1</i>         | glutathione S-transferase, mu 1                                                             | 1.53 |
| A_51_P109369  | <i>Fbxo32</i>        | F-box protein 32                                                                            | 1.53 |
| A_55_P2221236 | <i>AU024180</i>      | expressed sequence AU024180                                                                 | 1.53 |
| A_51_P107020  | <i>Kif5a</i>         | kinesin family member 5A                                                                    | 1.53 |
| A_51_P175424  | <i>Car14</i>         | carbonic anhydrase 14                                                                       | 1.53 |
| A_51_P171200  | <i>Golm1</i>         | golgi membrane protein 1                                                                    | 1.53 |
| A_52_P303891  | <i>Nr1d2</i>         | nuclear receptor subfamily 1, group D, member 2                                             | 1.53 |
| A_52_P234729  | <i>Pkd2</i>          | polycystic kidney disease 2                                                                 | 1.53 |
| A_51_P329949  | <i>Fam13a</i>        | family with sequence similarity 13, member A                                                | 1.52 |

|               |                      |                                                               |      |
|---------------|----------------------|---------------------------------------------------------------|------|
| A_66_P137660  | <i>Fam166b</i>       | family with sequence similarity 166. member B                 | 1.52 |
| A_52_P598309  | <i>1500012F01Rik</i> | RIKEN cDNA 1500012F01 gene                                    | 1.52 |
| A_51_P513032  | <i>Trps1</i>         | trichorhinophalangeal syndrome I (human)                      | 1.52 |
| A_66_P117730  | <i>Hapln1</i>        | hyaluronan and proteoglycan link protein 1                    | 1.52 |
| A_55_P2113673 | <i>Em11</i>          | echinoderm microtubule associated protein like 1              | 1.52 |
| A_55_P2104487 | <i>Pld1</i>          | phospholipase D1                                              | 1.52 |
| A_55_P2068882 | <i>Ccng2</i>         | cyclin G2                                                     | 1.52 |
| A_51_P113403  | <i>Slc26a11</i>      | solute carrier family 26. member 11                           | 1.52 |
| A_51_P421538  | <i>Nhedc2</i>        | Na <sup>+</sup> /H <sup>+</sup> exchanger domain containing 2 | 1.52 |
| A_55_P2156186 | <i>BC028528</i>      | cDNA sequence BC028528                                        | 1.52 |
| A_51_P445487  | <i>2410066E13Rik</i> | RIKEN cDNA 2410066E13 gene                                    | 1.52 |
| A_51_P113403  | <i>Slc26a11</i>      | solute carrier family 26. member 11                           | 1.51 |
| A_55_P2058933 | <i>Kif1b</i>         | kinesin family member 1B                                      | 1.51 |
| A_51_P144349  | <i>Dtx4</i>          | deltex 4 homolog (Drosophila)                                 | 1.51 |
| A_55_P2082989 | <i>5430435G22Rik</i> | RIKEN cDNA 5430435G22 gene                                    | 1.51 |
| A_51_P113403  | <i>Slc26a11</i>      | solute carrier family 26. member 11                           | 1.51 |
| A_51_P107020  | <i>Kif5a</i>         | kinesin family member 5A                                      | 1.51 |
| A_55_P1955931 | <i>Slc25a42</i>      | solute carrier family 25. member 42                           | 1.51 |
| A_52_P211956  | <i>Ms4a4d</i>        | membrane-spanning 4-domains. subfamily A. member 4D           | 1.51 |
| A_55_P2004213 | <i>Gprasp2</i>       | G protein-coupled receptor associated sorting protein 2       | 1.51 |
| A_51_P472932  | <i>Atp8b1</i>        | ATPase. class I. type 8B. member 1                            | 1.51 |
| A_55_P1989563 | <i>Cd163l1</i>       | CD163 molecule-like 1                                         | 1.51 |
| A_51_P387379  | <i>Tshz3</i>         | teashirt zinc finger family member 3                          | 1.51 |
| A_52_P596008  | <i>Zeb2</i>          | zinc finger E-box binding homeobox 2                          | 1.50 |
| A_66_P100565  | <i>Ccdc107</i>       | coiled-coil domain containing 107                             | 1.50 |
| A_51_P113403  | <i>Slc26a11</i>      | solute carrier family 26. member 11                           | 1.50 |
| A_55_P1988623 | <i>Add3</i>          | adducin 3 (gamma)                                             | 1.50 |
| A_51_P393426  | <i>Pros1</i>         | protein S (alpha)                                             | 1.50 |
